# Supplementary material for: New Color-Patterned Species of Microtendipes Kieffer, 1913 (Diptera: Chironomidae) and a Deep Intraspecific Divergence of Species by DNA Barcodes
Source: MDPI journal article supplement (doi:10.3390/insects14030227), 2023-02-24

| Nb subsets/asap score                               | [57/20.5] | [33/14.5] | [31/7.0] | [29/9.0] | [28/7.0] | [26/4.0] | [26/4.0] | [25/15.0] | [24/8.0] | [22/14.0] |
|-----------------------------------------------------|-----------|-----------|----------|----------|----------|----------|----------|-----------|----------|-----------|
| Rank                                                | [10]      | [8]       | [3]      | [6]      | [4]      | [1]      | [2]      | [9]       | [5]      | [7]       |
| Microtendipes_bimaculatus_ZJCH600_WYS403            |           | 10        | 10       | 10       | 10       | 10       | 10       | 10        | 19       | 19        |
| Microtendipes_bimaculatus_ZJCH551_WYS354            | 9         |           |          |          |          |          |          |           |          |           |
| Microtendipes_bimaculatus_ZJCH201_BSZ68             |           |           |          |          |          |          |          |           |          |           |
| Microtendipes_bimaculatus_ZJCH073_BSZ28             |           |           |          |          |          |          |          |           |          |           |
| Microtendipes_bimaculatus_ZJCH050_BSZ05             |           |           |          |          |          |          |          |           |          |           |
| Microtendipes_bimaculatus_ZJCH046_BSZ01             |           |           |          |          |          |          |          |           |          |           |
| Microtendipes_bimaculatus_ZJCH114_WYS33             |           |           |          |          |          |          |          |           |          |           |
| Microtendipes_bimaculatus_ZJCH521_WYS324            |           |           |          |          |          |          |          |           |          |           |
| Microtendipes_bimaculatus_ZJCH104_WYS23             |           |           |          |          |          |          |          |           |          |           |
| Microtendipes_bimaculatus_ZJCH495_WYS298            |           |           |          |          |          |          |          |           |          |           |
| Microtendipes_robustus_ZJCH498_WYS301               |           | 7         | 7        | 7        | 9        | 9        | 9        | 9         |          |           |
| Microtendipes_robustus_ZJCH474_WYS277               |           |           |          |          |          |          |          |           |          |           |
| Microtendipes_robustus_ZJCH482_WYS285               | 3         |           |          |          |          |          |          |           |          |           |
| Microtendipes_robustus_ZJCH470_WYS273               |           |           |          |          |          |          |          |           |          |           |
| Microtendipes_robustus_ZJCH102_WYS21                |           |           |          |          |          |          |          |           |          |           |
| Microtendipes_robustus_ZJCH202_BSZ69                | 2         |           |          |          |          |          |          |           |          |           |
| Microtendipes_robustus_ZJCH120_WYS39                |           |           |          |          |          |          |          |           |          |           |
| Microtendipes_robustus_ZJCH365_WYS168               | 2         | 2         | 2        | 2        |          |          |          |           |          |           |
| Microtendipes_robustus ZJCH286 WYS89                |           |           |          |          |          |          |          |           |          |           |
| Microtendipes_tamaogouti LC329139                   |           |           |          | 2        | 2        | 2        | 2        | 2         | 2        | 2         |
| Microtendipes_chloris LC329130                      |           |           |          |          |          |          |          |           |          |           |
| Microtendipes_tamaogouti LC329138                   |           | 3         | 3        | 3        | 3        | 3        | 3        | 3         | 3        | 3         |
| Microtendipes_tamaogouti LC329133                   |           |           |          |          |          |          |          |           |          |           |
| Microtendipes_tamaogouti LC329140                   |           |           |          |          |          |          |          |           |          |           |
| Microtendipes_nigellus TRD-CH79 TRD-CH79            | 2         | 2         | 2        | 2        | 2        | 3        | 3        | 3         | 3        | 3         |
| Microtendipes_nigellus Finnmark143 Fi143            |           |           |          |          |          |          |          |           |          |           |
| Microtendipes_chloris Finnmark416 Fi416             |           |           |          |          |          |          |          |           |          |           |
| Microtendipes_pedellus LA_LSLRZ15_134               | 2         | 2         | 5        | 5        | 5        | 5        | 5        | 5         | 5        | 5         |
| Microtendipes_pedellus LA_LSLRZ15_12                |           |           |          |          |          |          |          |           |          |           |
| Microtendipes_pedellus LA_AS16_114                  | 3         | 3         |          |          |          |          |          |           |          |           |
| Microtendipes_pedellus LA_LSLZ10_222                |           |           |          |          |          |          |          |           |          |           |
| Microtendipes_pedellus LA_LSLRZ13_245               |           |           |          |          |          |          |          |           |          |           |
| Microtendipes_pedellus NO_85 NO_85                  | 2         | 7         | 7        | 7        | 7        | 7        | 7        | 7         | 7        | 7         |
| Microtendipes_pedellus TRD-CH80 TRD-CH80            |           |           |          |          |          |          |          |           |          |           |
| Microtendipes BIOUG52512-B01 MAL_BLAT_1             | 4         |           |          |          |          |          |          |           |          |           |
| Microtendipes PU_LSLP7_290                          |           |           |          |          |          |          |          |           |          |           |
| Microtendipes_chloris IM_PL7V14_263                 |           |           |          |          |          |          |          |           |          |           |
| Microtendipes_sp._PA6_2 KY225366                    |           |           |          |          |          |          |          |           |          |           |
| Microtendipes_brevitarsis TRD-CH263 TRD-CH263       |           |           |          |          |          |          |          |           |          |           |
| Microtendipes_baishanzuensis HW013 HW013            | 5         | 5         | 5        | 5        | 5        | 5        | 5        | 5         | 5        | 5         |
| Microtendipes_baishanzuensis_ZJCH204_BSZ71          |           |           |          |          |          |          |          |           |          |           |
| Microtendipes_baishanzuensis_ZJCH072_BSZ27          |           |           |          |          |          |          |          |           |          |           |
| Microtendipes_baishanzuensis_ZJCH067_BSZ22          |           |           |          |          |          |          |          |           |          |           |
| Microtendipes_baishanzuensis_ZJCH077_BSZ32          |           |           |          |          |          |          |          |           |          |           |
| Microtendipes_bimaculatus_ZJCH240_BSZ107            | 3         | 3         | 3        | 3        | 3        | 3        | 3        | 3         | 3        | 3         |
| Microtendipes_bimaculatus_ZJCH228_BSZ95             |           |           |          |          |          |          |          |           |          |           |
| Microtendipes_bimaculatus_ZJCH217_BSZ84             |           |           |          |          |          |          |          |           |          |           |
| Microtendipes_bimaculatus_ZJCH462_WYS265            | 2         | 2         | 2        | 2        | 2        | 2        | 2        | 2         | 2        | 2         |
| Microtendipes_bimaculatus_ZJCH457_WYS260            |           |           |          |          |          |          |          |           |          |           |
| Microtendipes_nigrithorax_CH413_CH413               | 5         | 5         | 5        | 5        | 5        | 5        | 5        | 11        | 11       | 11        |
| Microtendipes_nigrithorax_CH412_CH412               |           |           |          |          |          |          |          |           |          |           |
| Microtendipes_nigrithorax CH377 CH377               |           |           |          |          |          |          |          |           |          |           |
| Microtendipes_nigrithorax_CH407_CH407               |           |           |          |          |          |          |          |           |          |           |
| Microtendipes_nigrithorax_CH392_CH392               |           |           |          |          |          |          |          |           |          |           |
| Microtendipes_nigrithorax_CH410_CH410               | 4         | 6         | 6        | 6        | 6        | 6        | 6        |           |          |           |
| Microtendipes_nigrithorax_CH422_CH422               |           |           |          |          |          |          |          |           |          |           |
| Microtendipes_nigrithorax_CH417_CH417               |           |           |          |          |          |          |          |           |          |           |
| Microtendipes_nigrithorax_CH418_CH418               |           |           |          |          |          |          |          |           |          |           |
| Microtendipes_nigrithorax_CH409_CH409               | 2         |           |          |          |          |          |          |           |          |           |
| Microtendipes_nigrithorax_CH388_CH388               |           |           |          |          |          |          |          |           |          |           |
| Microtendipes_pedellus BIOUG22359-A07 GMP*07726     | 21        | 28        | 28       | 28       | 28       | 28       | 28       | 28        | 28       | 33        |
| Microtendipes_pedellus BIOUG24011-F06 L*15RARE-0211 |           |           |          |          |          |          |          |           |          |           |
| Microtendipes_pedellus BIOUG30547-C06 GMP*07686     |           |           |          |          |          |          |          |           |          |           |
| Microtendipes_pedellus BIOUG13278-F05 L*13BIOBUS-25 |           |           |          |          |          |          |          |           |          |           |
| Microtendipes_pedellus BIOUG09712-A03 GMP*01066     |           |           |          |          |          |          |          |           |          |           |
| Microtendipes_pedellus BIOUG30548-D03 GMP*07686     |           |           |          |          |          |          |          |           |          |           |
| Microtendipes_pedellus BIOUG36980-B12 L*17AGEA1-021 |           |           |          |          |          |          |          |           |          |           |
| Microtendipes_pedellus BIOUG22287-G05 GMP*07747     |           |           |          |          |          |          |          |           |          |           |
| Microtendipes_pedellus BIOUG31048-D08 GMP*09564     |           |           |          |          |          |          |          |           |          |           |
| Microtendipes_pedellus BIOUG32940-C04 GMP*03365     |           |           |          |          |          |          |          |           |          |           |
| Microtendipes_pedellus BIOUG32940-A06 GMP*03365     |           |           |          |          |          |          |          |           |          |           |
| Microtendipes_pedellus BIOUG09355-A01 GMP*00966     |           |           |          |          |          |          |          |           |          |           |
| Microtendipes_pedellus BIOUG37031-G03 L*17AGAS2-180 |           |           |          |          |          |          |          |           |          |           |
| Microtendipes_pedellus BIOUG16136-G01 GMP*05717     |           |           |          |          |          |          |          |           |          |           |
| Microtendipes_pedellus BIOUG22357-F02 GMP*07726     |           |           |          |          |          |          |          |           |          |           |
| Microtendipes_pedellus BIOUG23417-G02 GMP*07732     |           |           |          |          |          |          |          |           |          |           |
| Microtendipes_pedellus BIOUG22362-E03 GMP*07726     |           |           |          |          |          |          |          |           |          |           |

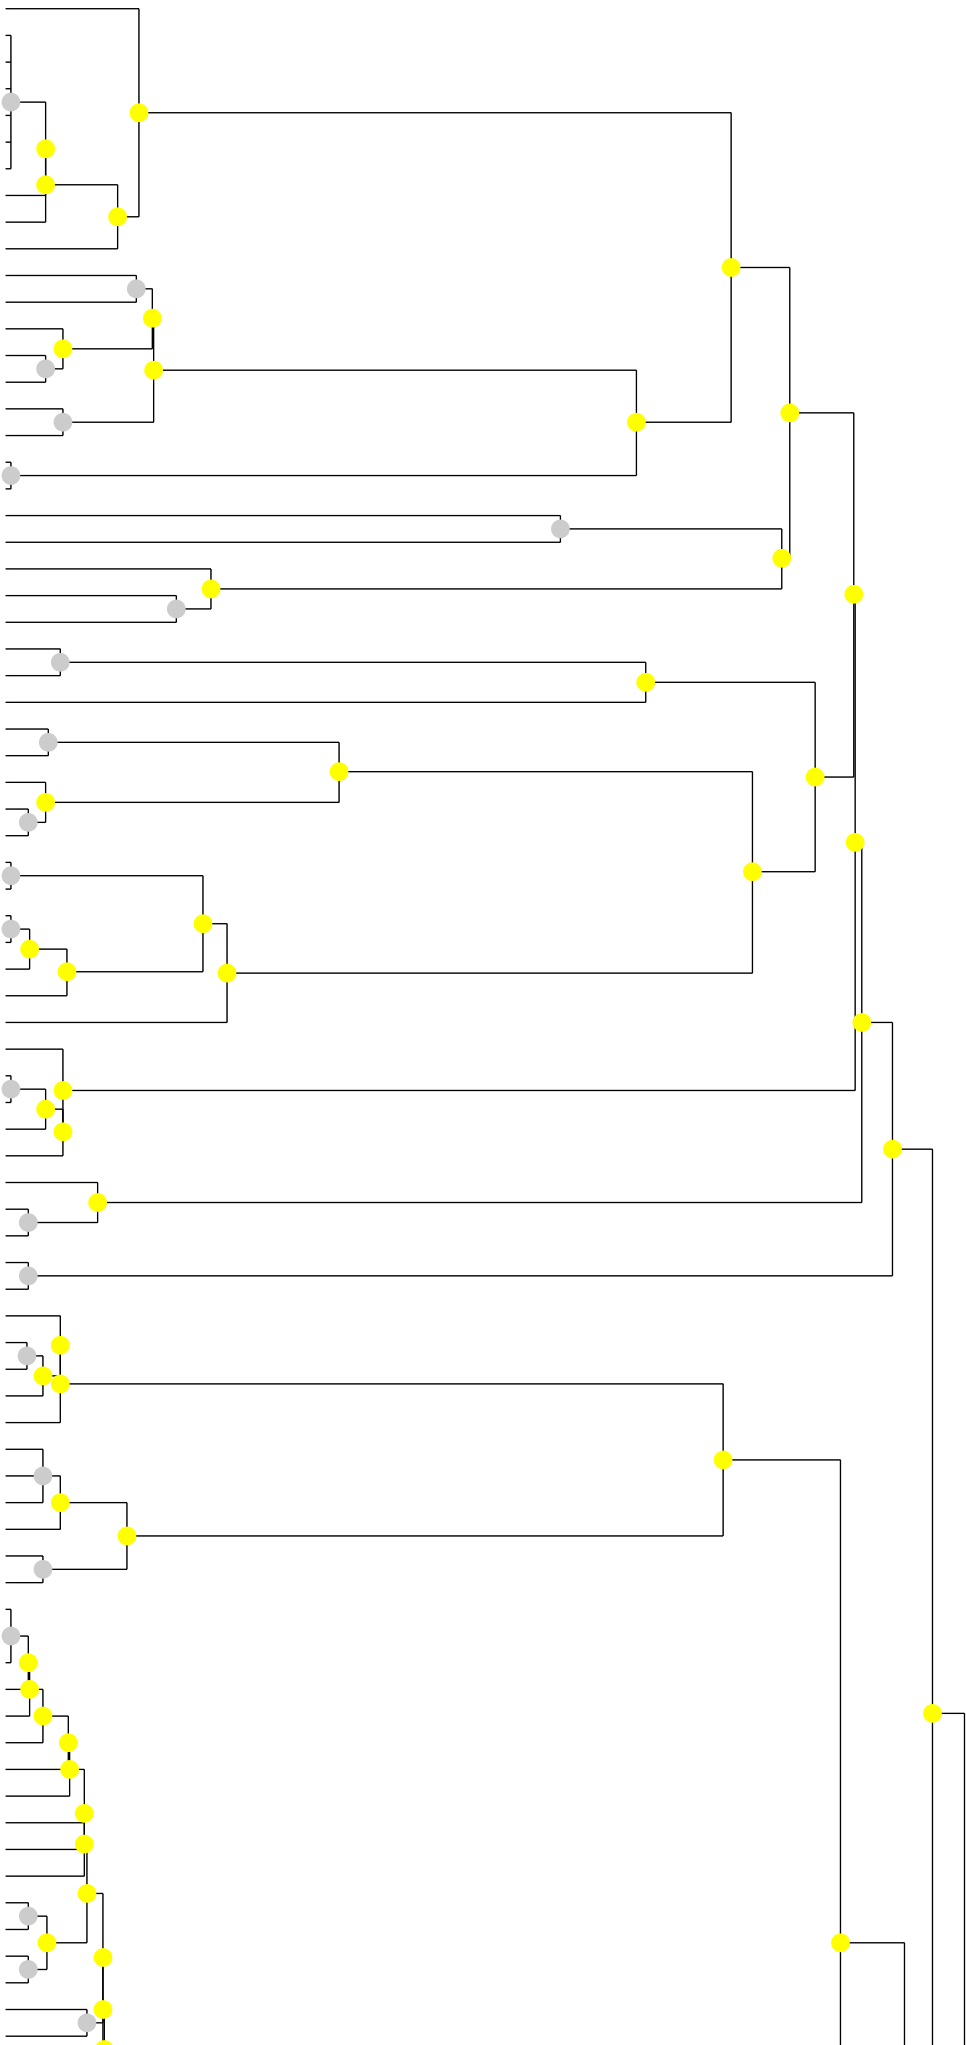

|                                                       |   |    |    |    |    |    |    |    |    |
|-------------------------------------------------------|---|----|----|----|----|----|----|----|----|
| Microtendipes_pedellus BIOUG37003-A07 L*17AGES5-17N   |   |    |    |    |    |    |    |    |    |
| Microtendipes_pedellus BIOUG22359-G12 GMP*07726       |   |    |    |    |    |    |    |    |    |
| Microtendipes_pedellus BIOUG22240-B02 GMP*07746       |   |    |    |    |    |    |    |    |    |
| Microtendipes_pedellus BIOUG08876-H11 GMP*00555       |   |    |    |    |    |    |    |    |    |
| Microtendipes_pedellus BIOUG43951-F03 L*15BIOBUS-023  |   |    |    |    |    |    |    |    |    |
| Microtendipes_pedellus BIOUG22418-H02 GMP*07727       |   |    |    |    |    |    |    |    |    |
| Microtendipes_pedellus BIOUG22359-F06 GMP*07726       |   |    |    |    |    |    |    |    |    |
| Microtendipes_pedellus BIOUG14692-B02 L*13BIOBUS-063  |   |    |    |    |    |    |    |    |    |
| Microtendipes_pedellus BIOUG09747-D03 GMP*01132       |   |    |    |    |    |    |    |    |    |
| Microtendipes_pedellus BIOUG09648-E04 GMP*01132       |   |    |    |    |    |    |    |    |    |
| Microtendipes_pedellus 09BBEDI-2895 L*09CB-100        |   |    |    |    |    |    |    |    |    |
| Microtendipes_sp.3BD BIOUG17262-E12 GMP*06027         | 2 | 2  | 2  | 2  | 2  | 2  | 2  | 2  |    |
| Microtendipes_sp.3BD BIOUG16526-E02 GMP*06016         |   |    |    |    |    |    |    |    |    |
| Microtendipes_confinis BIOUG17376-H09 GMP*06028       | 3 | 3  | 3  | 3  | 3  | 3  | 3  | 3  |    |
| Microtendipes_confinis NHRS-BYWS000000343             |   |    |    |    |    |    |    |    |    |
| Microtendipes_confinis NHRS-BYWS000000905             |   |    |    |    |    |    |    |    |    |
| Microtendipes_pedellus_grp2. 10-SCCWRP-1528 19342     | 3 | 4  | 4  | 4  | 4  | 4  | 4  | 4  | 4  |
| Microtendipes_pedellus_grp2. 10-SCCWRP-3152 19341     |   |    |    |    |    |    |    |    |    |
| Microtendipes_pedellus_grp2. 10-SCCWRP-3151 19341     |   |    |    |    |    |    |    |    |    |
| Microtendipes_pedellus_grp2. BIOUG50335-C05 L*MPG13   |   |    |    |    |    |    |    |    |    |
| Microtendipes_sp.2BD BIOUG46852-E12 GMP*11703         |   |    |    |    |    |    |    |    |    |
| Microtendipes_kamoprimum LC329132                     | 2 | 2  | 2  | 2  | 2  | 2  | 2  | 2  | 2  |
| Microtendipes_kamoprimum LC329131                     |   |    |    |    |    |    |    |    |    |
| Microtendipes_sp.1BD_INVSI16L151 MT186335             |   |    |    |    |    |    |    |    |    |
| Microtendipes_sp.1BD 09BBEDI-2051 L*09KC-014          | 4 | 18 | 20 | 20 | 20 | 21 | 21 | 21 | 21 |
| Microtendipes_sp.1BD BIOUG37372-F10 L*15BIOBUS-0519   |   |    |    |    |    |    |    |    |    |
| Microtendipes_sp.1BD BIOUG12500-H09 GMP*01105         |   |    |    |    |    |    |    |    |    |
| Microtendipes_sp.1BD BIOUG37373-B06 L*15BIOBUS-0519   |   |    |    |    |    |    |    |    |    |
| Microtendipes_sp.1BD BIOUG33071-A09 GMP*03715         | 3 |    |    |    |    |    |    |    |    |
| Microtendipes_sp.1BD BIOUG01338-F03 L*PHPUS-005       |   |    |    |    |    |    |    |    |    |
| Microtendipes_sp.1BD BIOUG33671-H08 GMP*03715         |   |    |    |    |    |    |    |    |    |
| Microtendipes_sp.1BD BIOUG65418-D03 GMP*04801         | 6 |    |    |    |    |    |    |    |    |
| Microtendipes_sp.1BD BIOUG18457-D07 GMP*03995         |   |    |    |    |    |    |    |    |    |
| Microtendipes_sp.1BD BIOUG09222-F05 GMP*01486         |   |    |    |    |    |    |    |    |    |
| Microtendipes_sp.1BD BIOUG18456-G12 GMP*03995         |   |    |    |    |    |    |    |    |    |
| Microtendipes_sp.1BD BIOUG18454-A12 GMP*03995         |   |    |    |    |    |    |    |    |    |
| Microtendipes_sp.1BD BIOUG06987-C10 L*12BIOBUS-0942   |   |    |    |    |    |    |    |    |    |
| Microtendipes_sp.1BD BIOUG20461-F07 GMP*03782         | 3 |    |    |    |    |    |    |    |    |
| Microtendipes_sp.1BD BIOUG34831-D05 GMP*03699         |   |    |    |    |    |    |    |    |    |
| Microtendipes_sp.1BD BIOUG34663-F07 GMP*03699         |   |    |    |    |    |    |    |    |    |
| Microtendipes_sp.1BD BIOUG20486-G07 GMP*03782         | 2 |    |    |    |    |    |    |    |    |
| Microtendipes_sp.1BD BIOUG03125-E12 GMP*00131         |   |    |    |    |    |    |    |    |    |
| Microtendipes_sp.1BDDNAS-49C-6ERW MT159584 MT152      |   | 2  |    |    |    |    |    |    |    |
| Microtendipes_sp.1BD BIOUG20460-D05 GMP*03782         |   |    |    |    |    |    |    |    |    |
| Microtendipes_tuberosus_ZJCH232_BSZ99                 |   | 2  | 2  | 2  | 2  | 2  | 2  | 2  | 2  |
| Microtendipes_tuberosus CH160 CH160                   |   |    |    |    |    |    |    |    |    |
| Microtendipes_pedellus_grp1. BIOUG51152-H06 L*MPG034  |   | 6  | 6  | 6  | 6  | 6  | 6  | 6  | 6  |
| Microtendipes_pedellus_grp1. BIOUG10382-H02 GMP*019   |   |    |    |    |    |    |    |    |    |
| Microtendipes_pedellus_grp1. BIOUG12642-B05 GMP*021   |   |    |    |    |    |    |    |    |    |
| Microtendipes_pedellus_grp1. 10BBDIP-0916 L*2010AZ-10 |   |    |    |    |    |    |    |    |    |
| Microtendipes_pedellus_grp1. BIOUG50454-H03 L*MPG14   | 3 |    |    |    |    |    |    |    |    |
| Microtendipes_pedellus_grp1. BIOUG25584-H09 GMP*083   |   |    |    |    |    |    |    |    |    |
| Microtendipes_wuyisensis_ZJCH385_WYS188               | 7 | 8  | 8  | 9  | 9  | 9  | 9  | 9  | 9  |
| Microtendipes_wuyisensis_ZJCH285_WYS88                |   |    |    |    |    |    |    |    |    |
| Microtendipes_wuyisensis_ZJCH406_WYS209               |   |    |    |    |    |    |    |    |    |
| Microtendipes_wuyisensis_ZJCH396_WYS199               |   |    |    |    |    |    |    |    |    |
| Microtendipes_wuyisensis_ZJCH395_WYS198               |   |    |    |    |    |    |    |    |    |
| Microtendipes_wuyisensis_ZJCH259_WYS62                |   |    |    |    |    |    |    |    |    |
| Microtendipes_wuyisensis_ZJCH129_WYS48                |   |    |    |    |    |    |    |    |    |
| Microtendipes_wuyiensis_ZJCH382_WYS185                |   |    |    |    |    |    |    |    |    |
| Microtendipes_wuyiensis_ZJCH361_WYS164                |   |    |    |    |    |    |    |    |    |
| Microtendipes_famiefeus LC462291 LC462291             | 3 | 6  | 6  | 6  | 6  | 6  | 6  | 6  | 6  |
| Microtendipes_famiefeus LC462292 LC462292             |   |    |    |    |    |    |    |    |    |
| Microtendipes_famiefeus LC462290 LC462290             |   |    |    |    |    |    |    |    |    |
| Microtendipes_famiefeus LC462289 LC462289             | 2 |    |    |    |    |    |    |    |    |
| Microtendipes_famiefeus LC462288 LC462288             |   |    |    |    |    |    |    |    |    |
| Microtendipes_famiefeus LC462287 LC462287             |   |    |    |    |    |    |    |    |    |
| Microtendipes_famiefeus LC462286 LC462286             | 2 | 3  | 3  | 3  | 3  | 3  | 3  | 3  | 3  |
| Microtendipes_famiefeus LC462285 LC462285             |   |    |    |    |    |    |    |    |    |
| Microtendipes_famiefeus XJ29 XJ29                     |   |    |    |    |    |    |    |    |    |
| Microtendipes_rydalensis_grp. 10-SCCWRP-1557 19342    | 2 | 2  | 2  | 2  | 2  | 2  | 2  | 2  | 2  |
| Microtendipes_rydalensis_grp. 10-SCCWRP-1556 19342    |   |    |    |    |    |    |    |    |    |
| Microtendipes_rydalensis ZMUO.025110                  | 2 | 2  | 2  | 2  | 2  | 2  | 2  | 2  | 2  |
| Microtendipes_rydalensis ZMUO.025111                  |   |    |    |    |    |    |    |    |    |

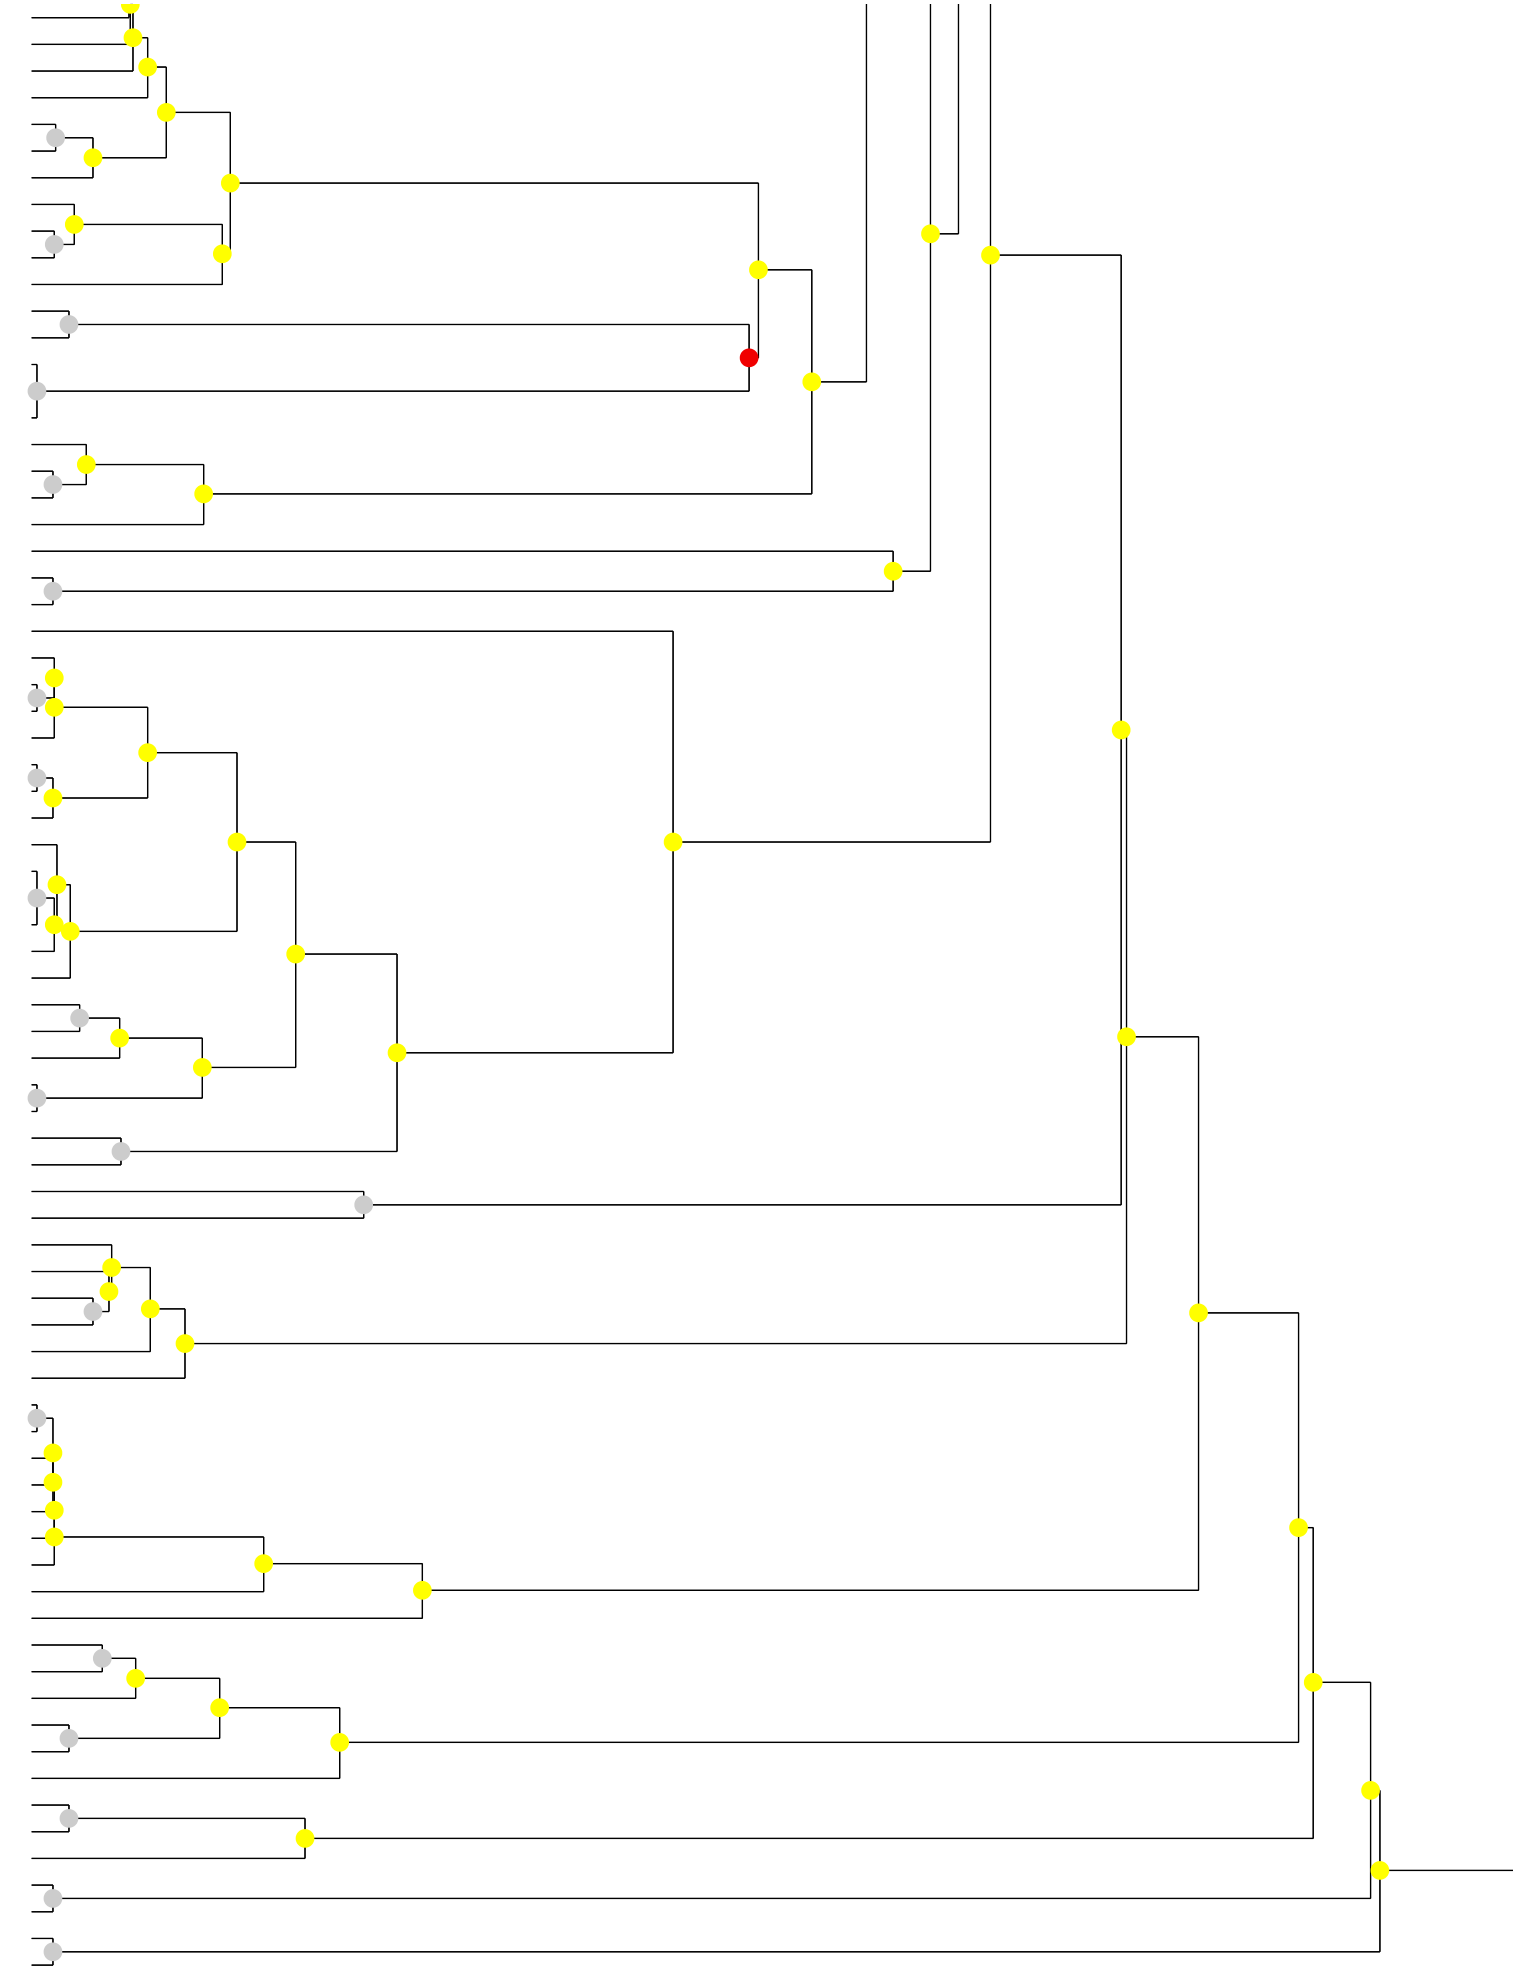

Supplement: s1 [file s1]
