# Supplementary figures and images for: New Color-Patterned Species of Microtendipes Kieffer, 1913 (Diptera: Chironomidae) and a Deep Intraspecific Divergence of Species by DNA Barcodes
Source: MDPI journal article supplement (doi:10.3390/insects14030227), 2023-02-24

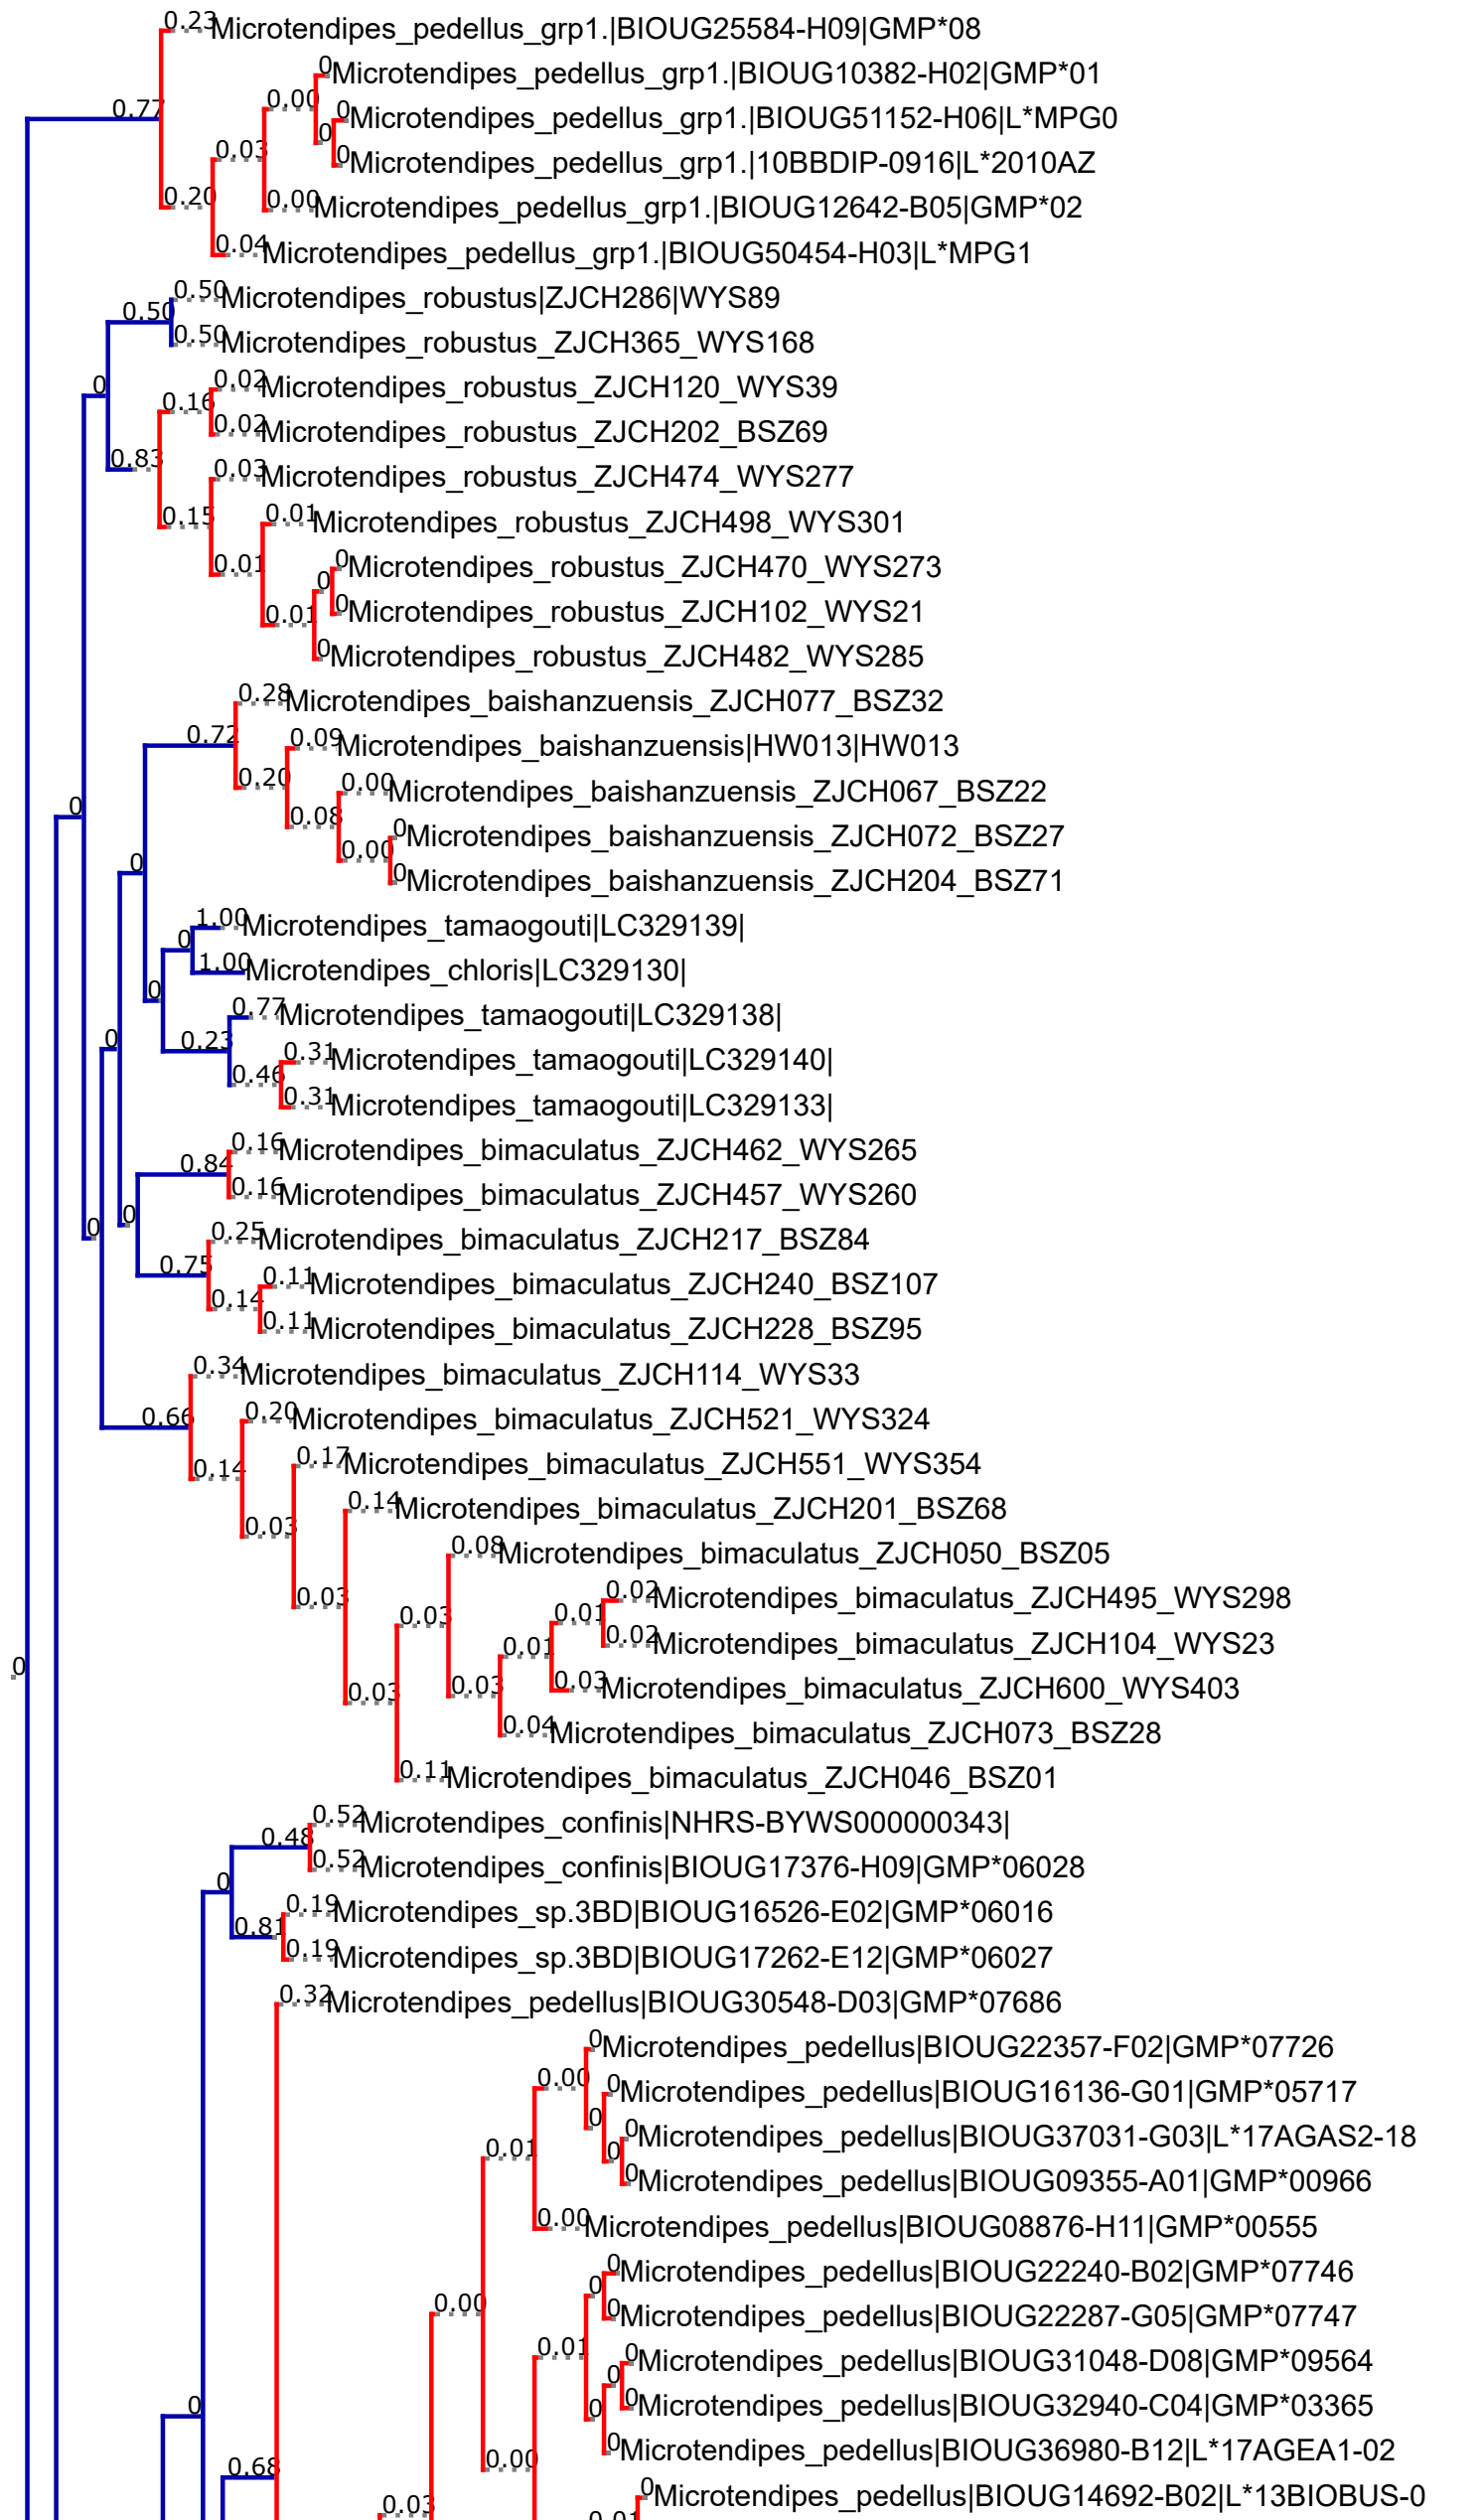

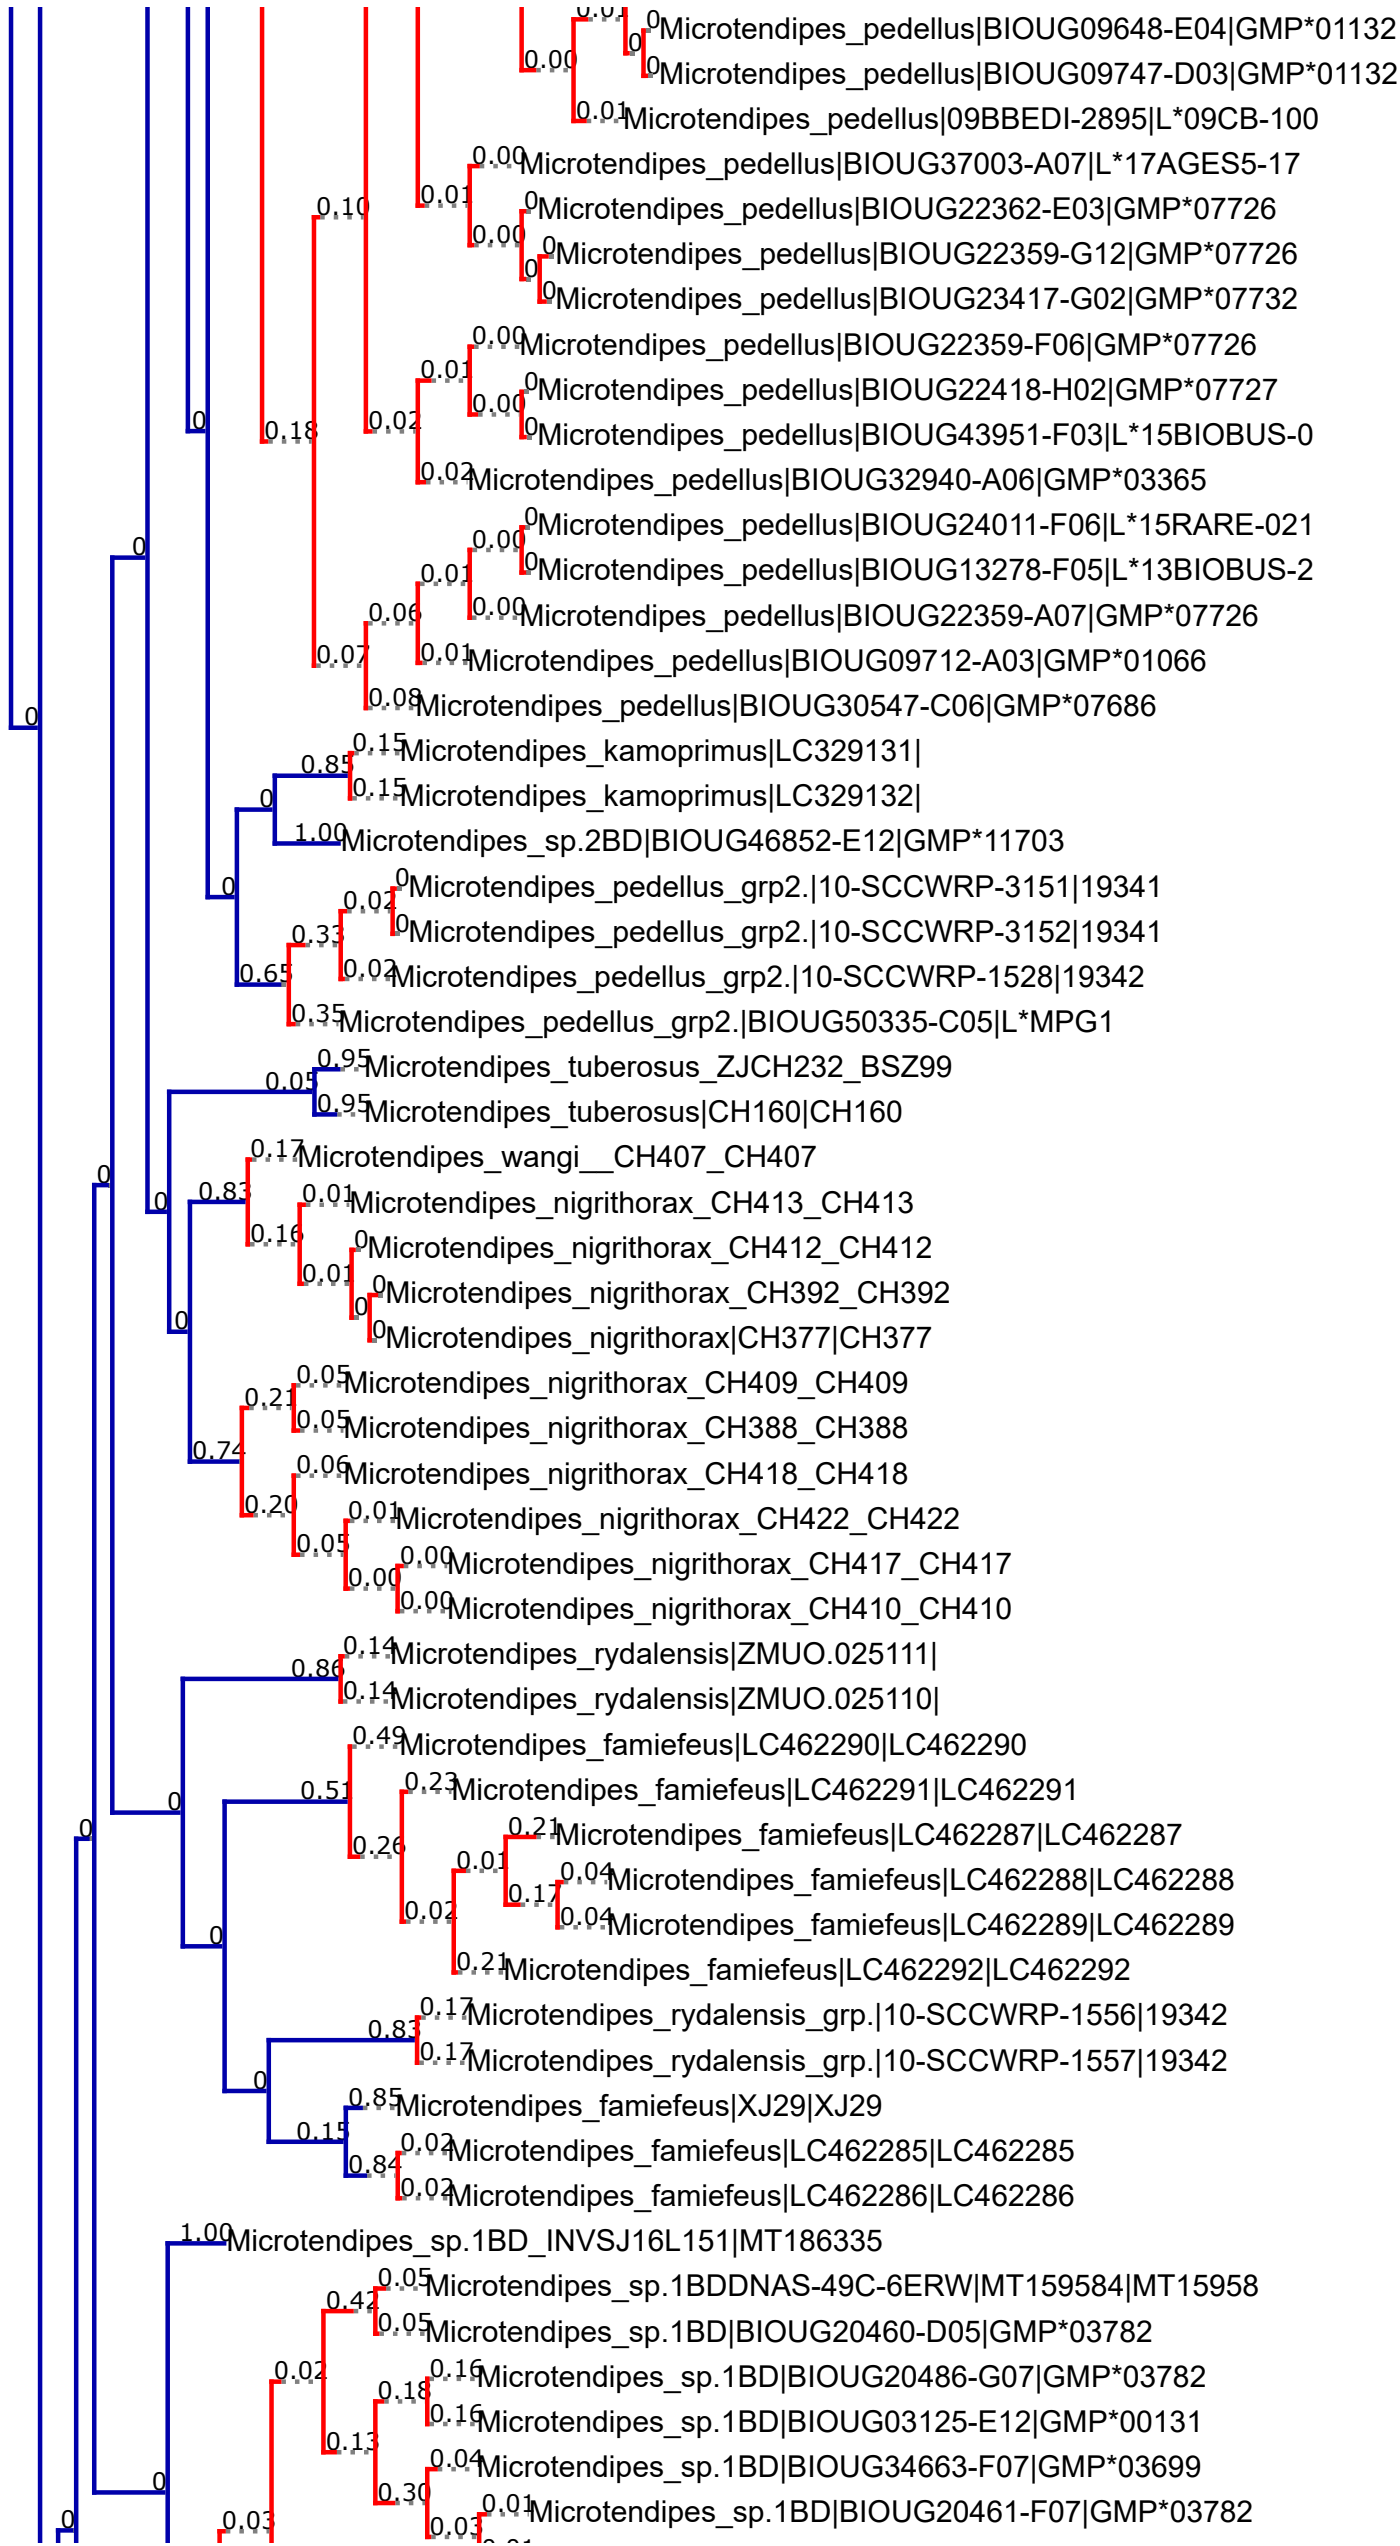

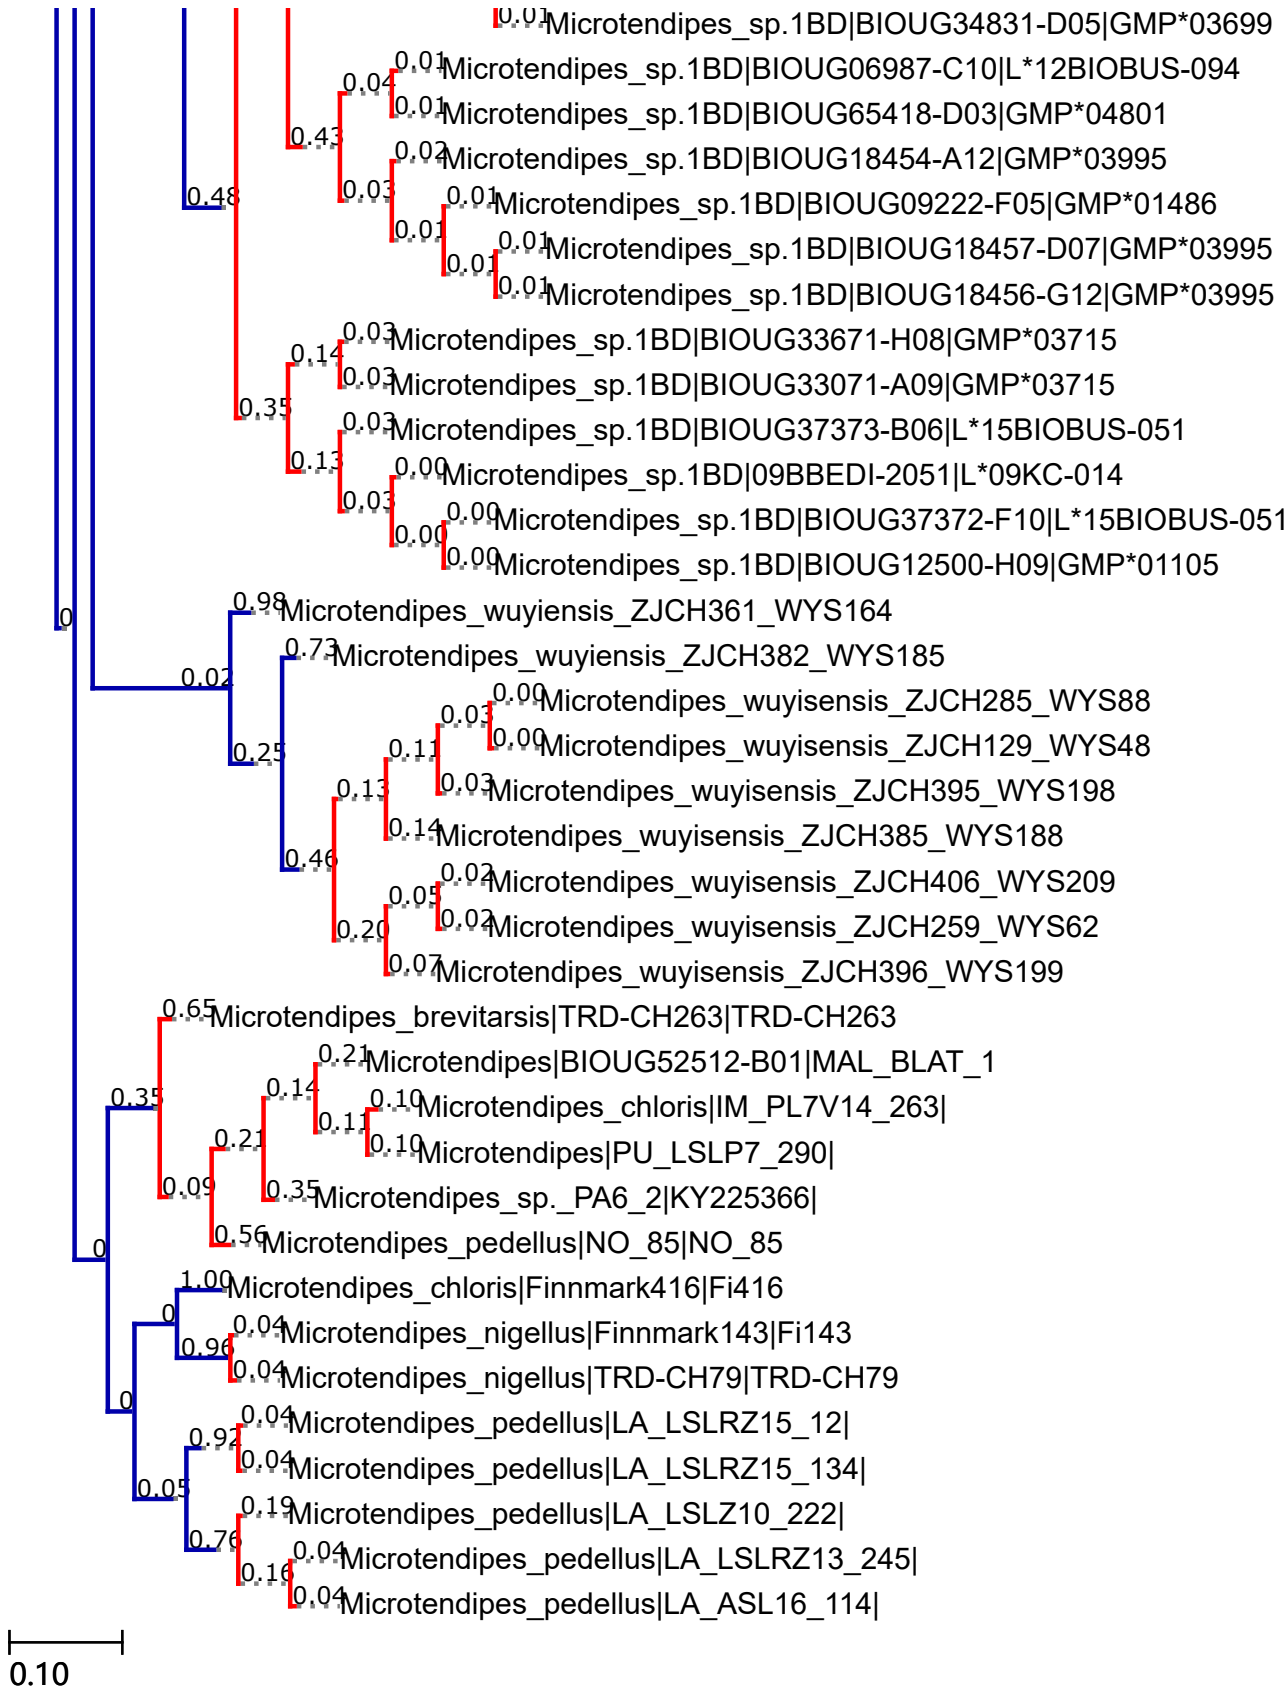

Supplement: s1 [file s1]

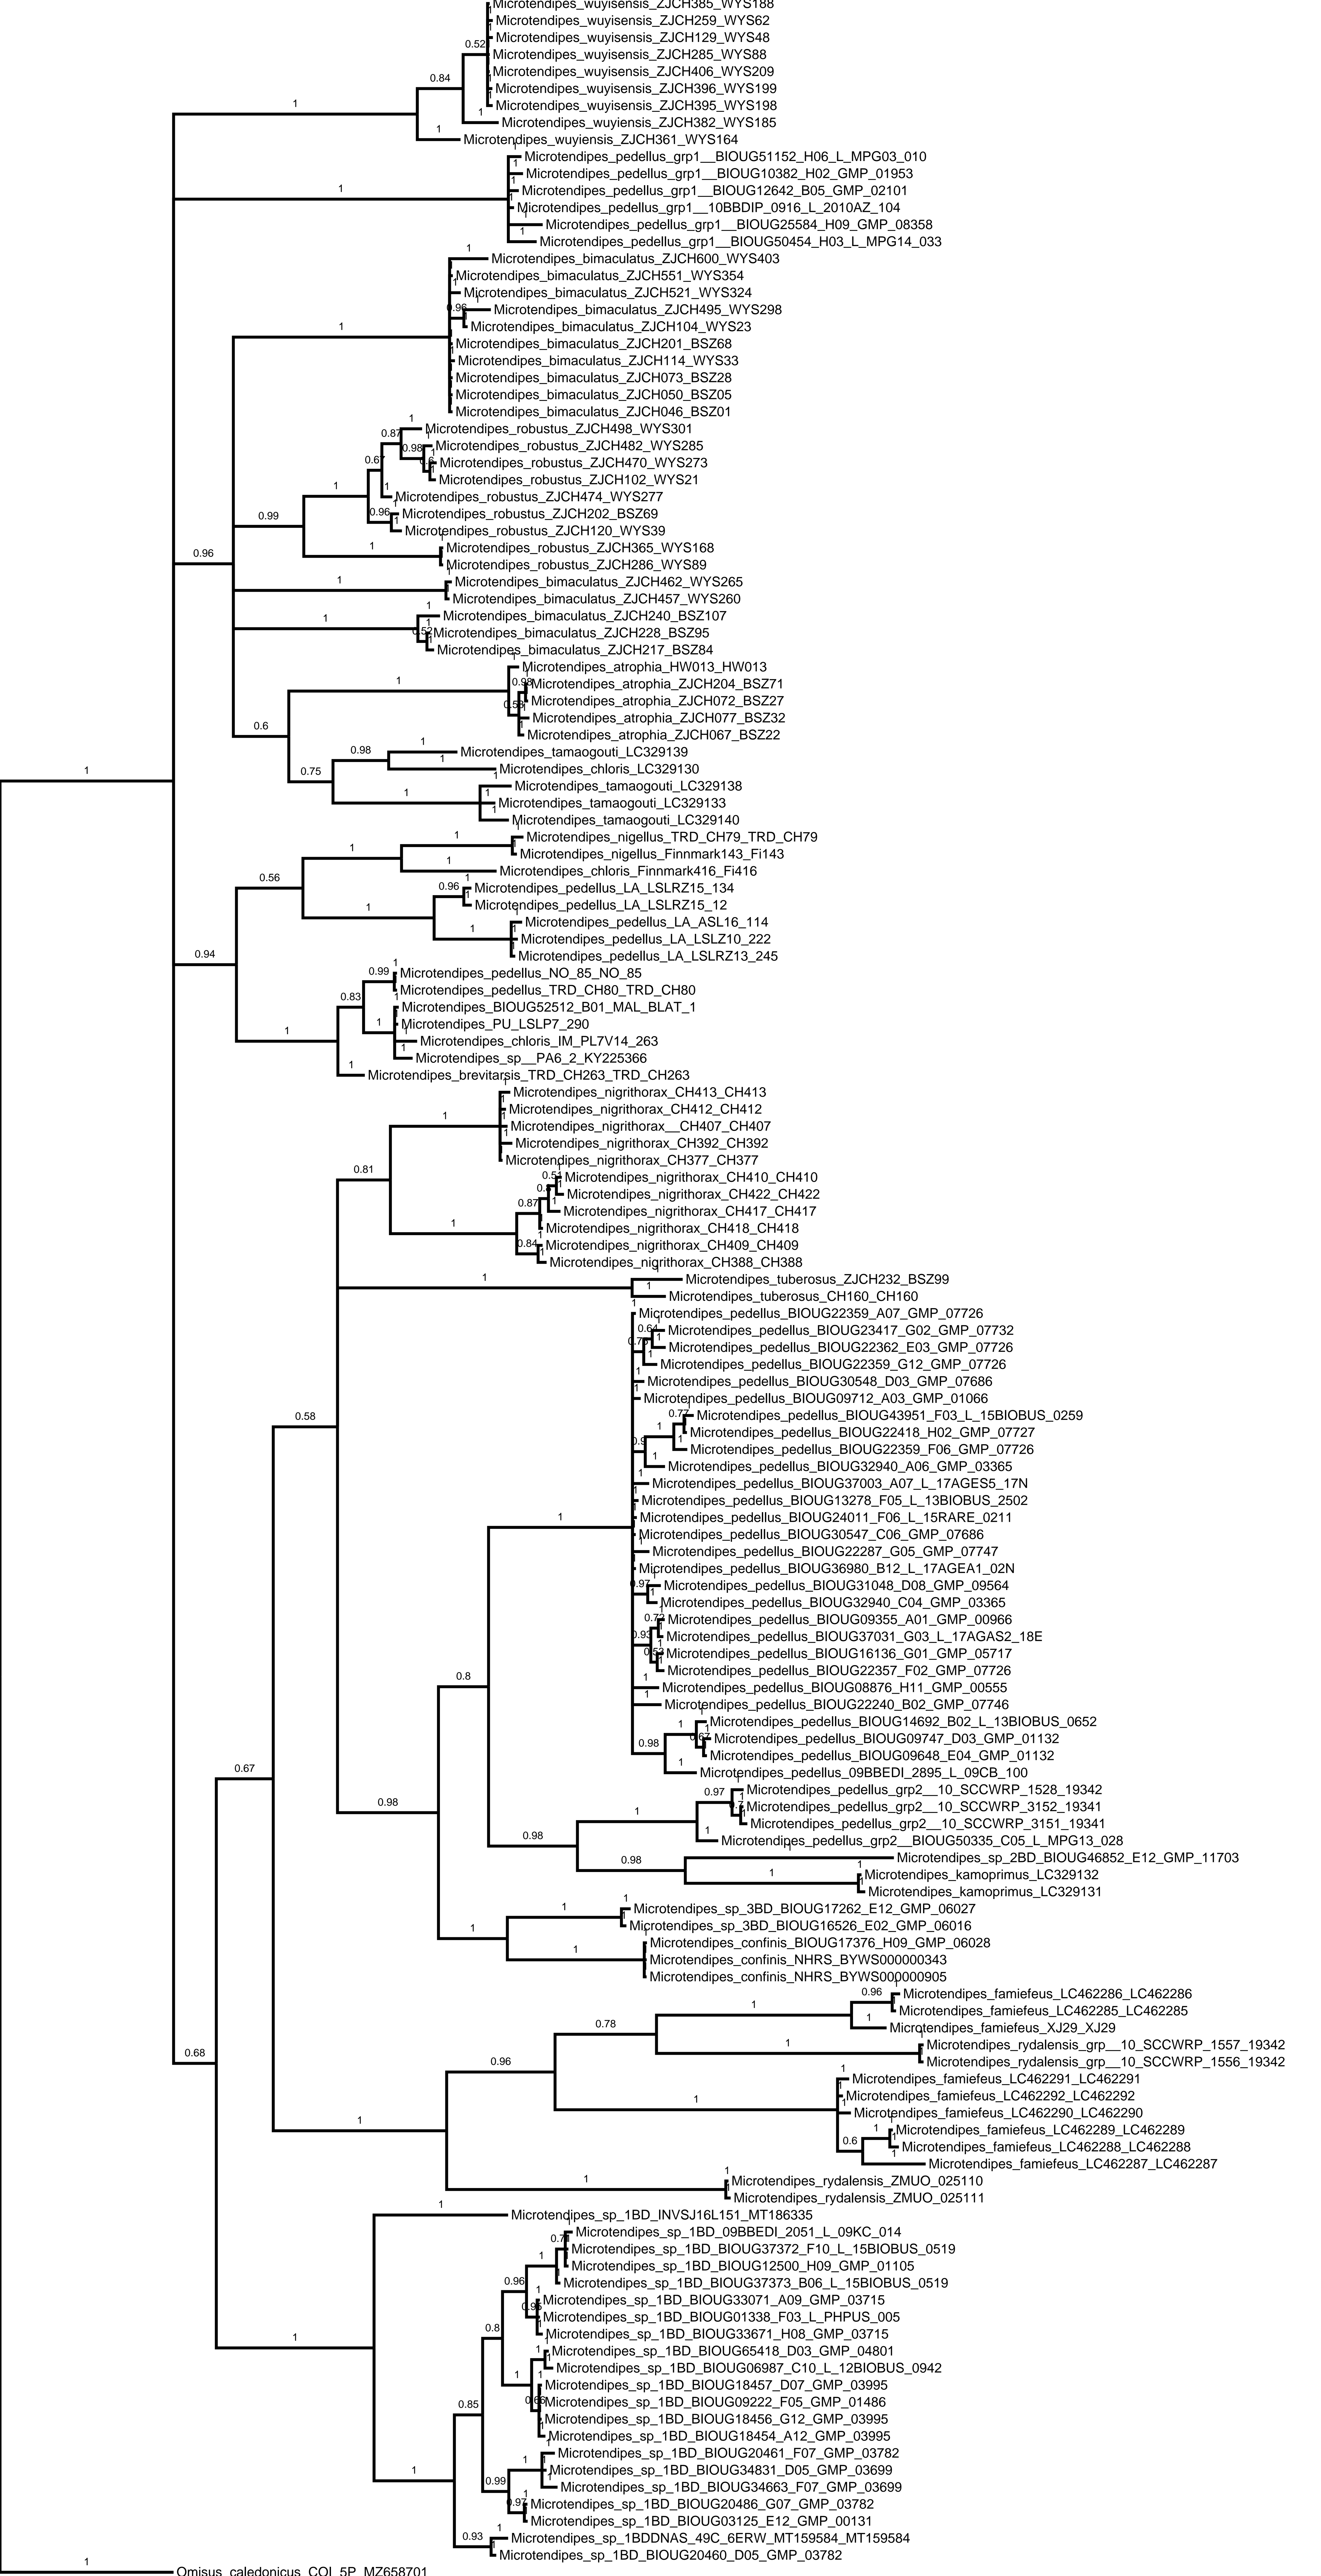

Supplement: s1 [file s1]

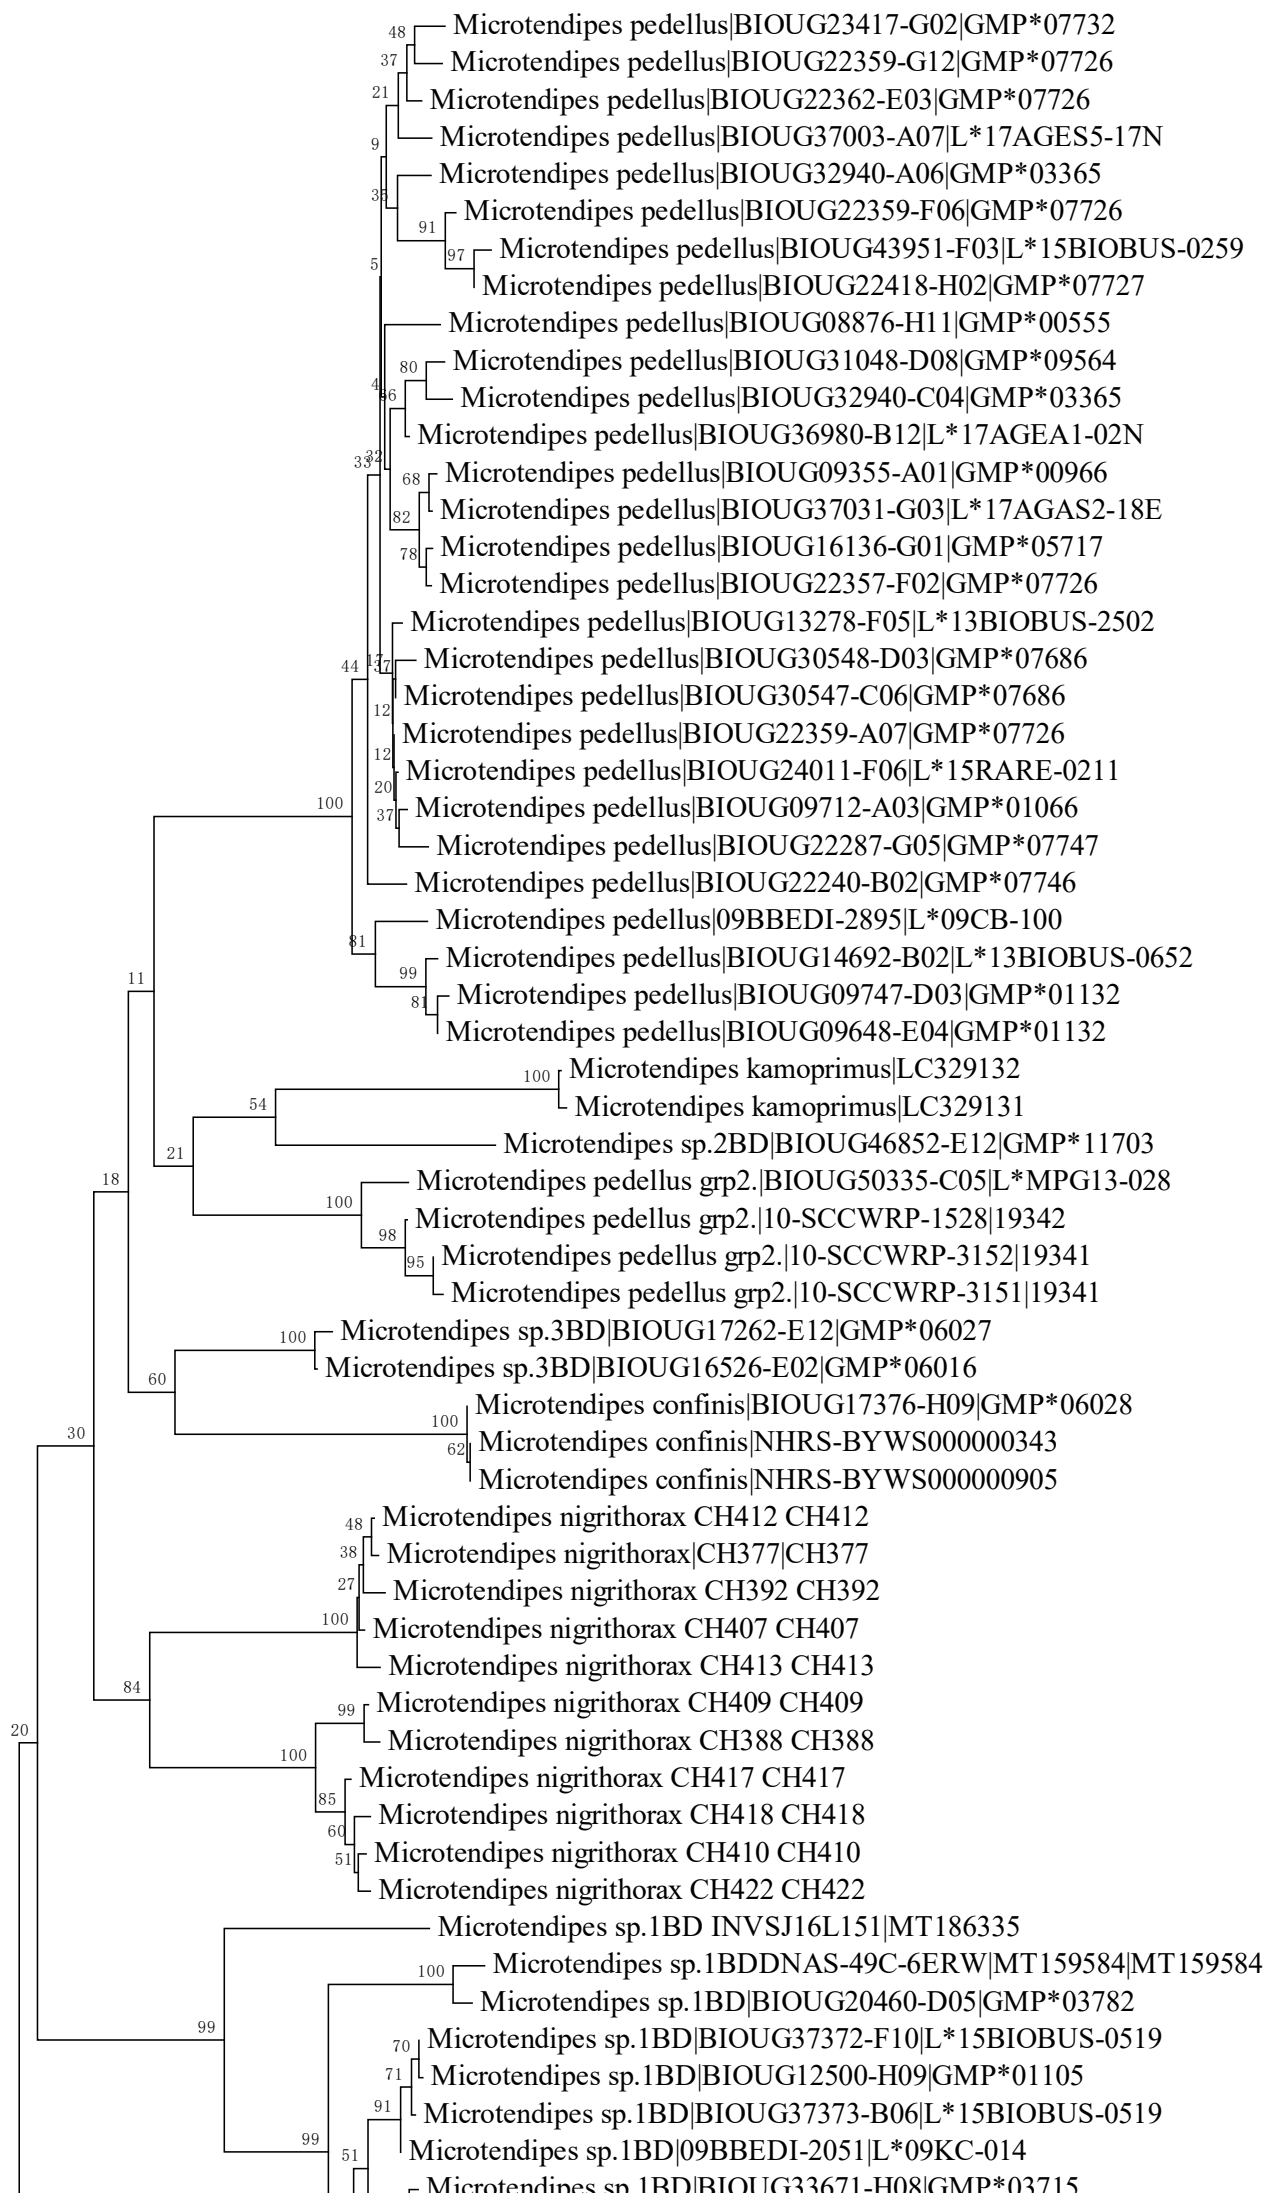

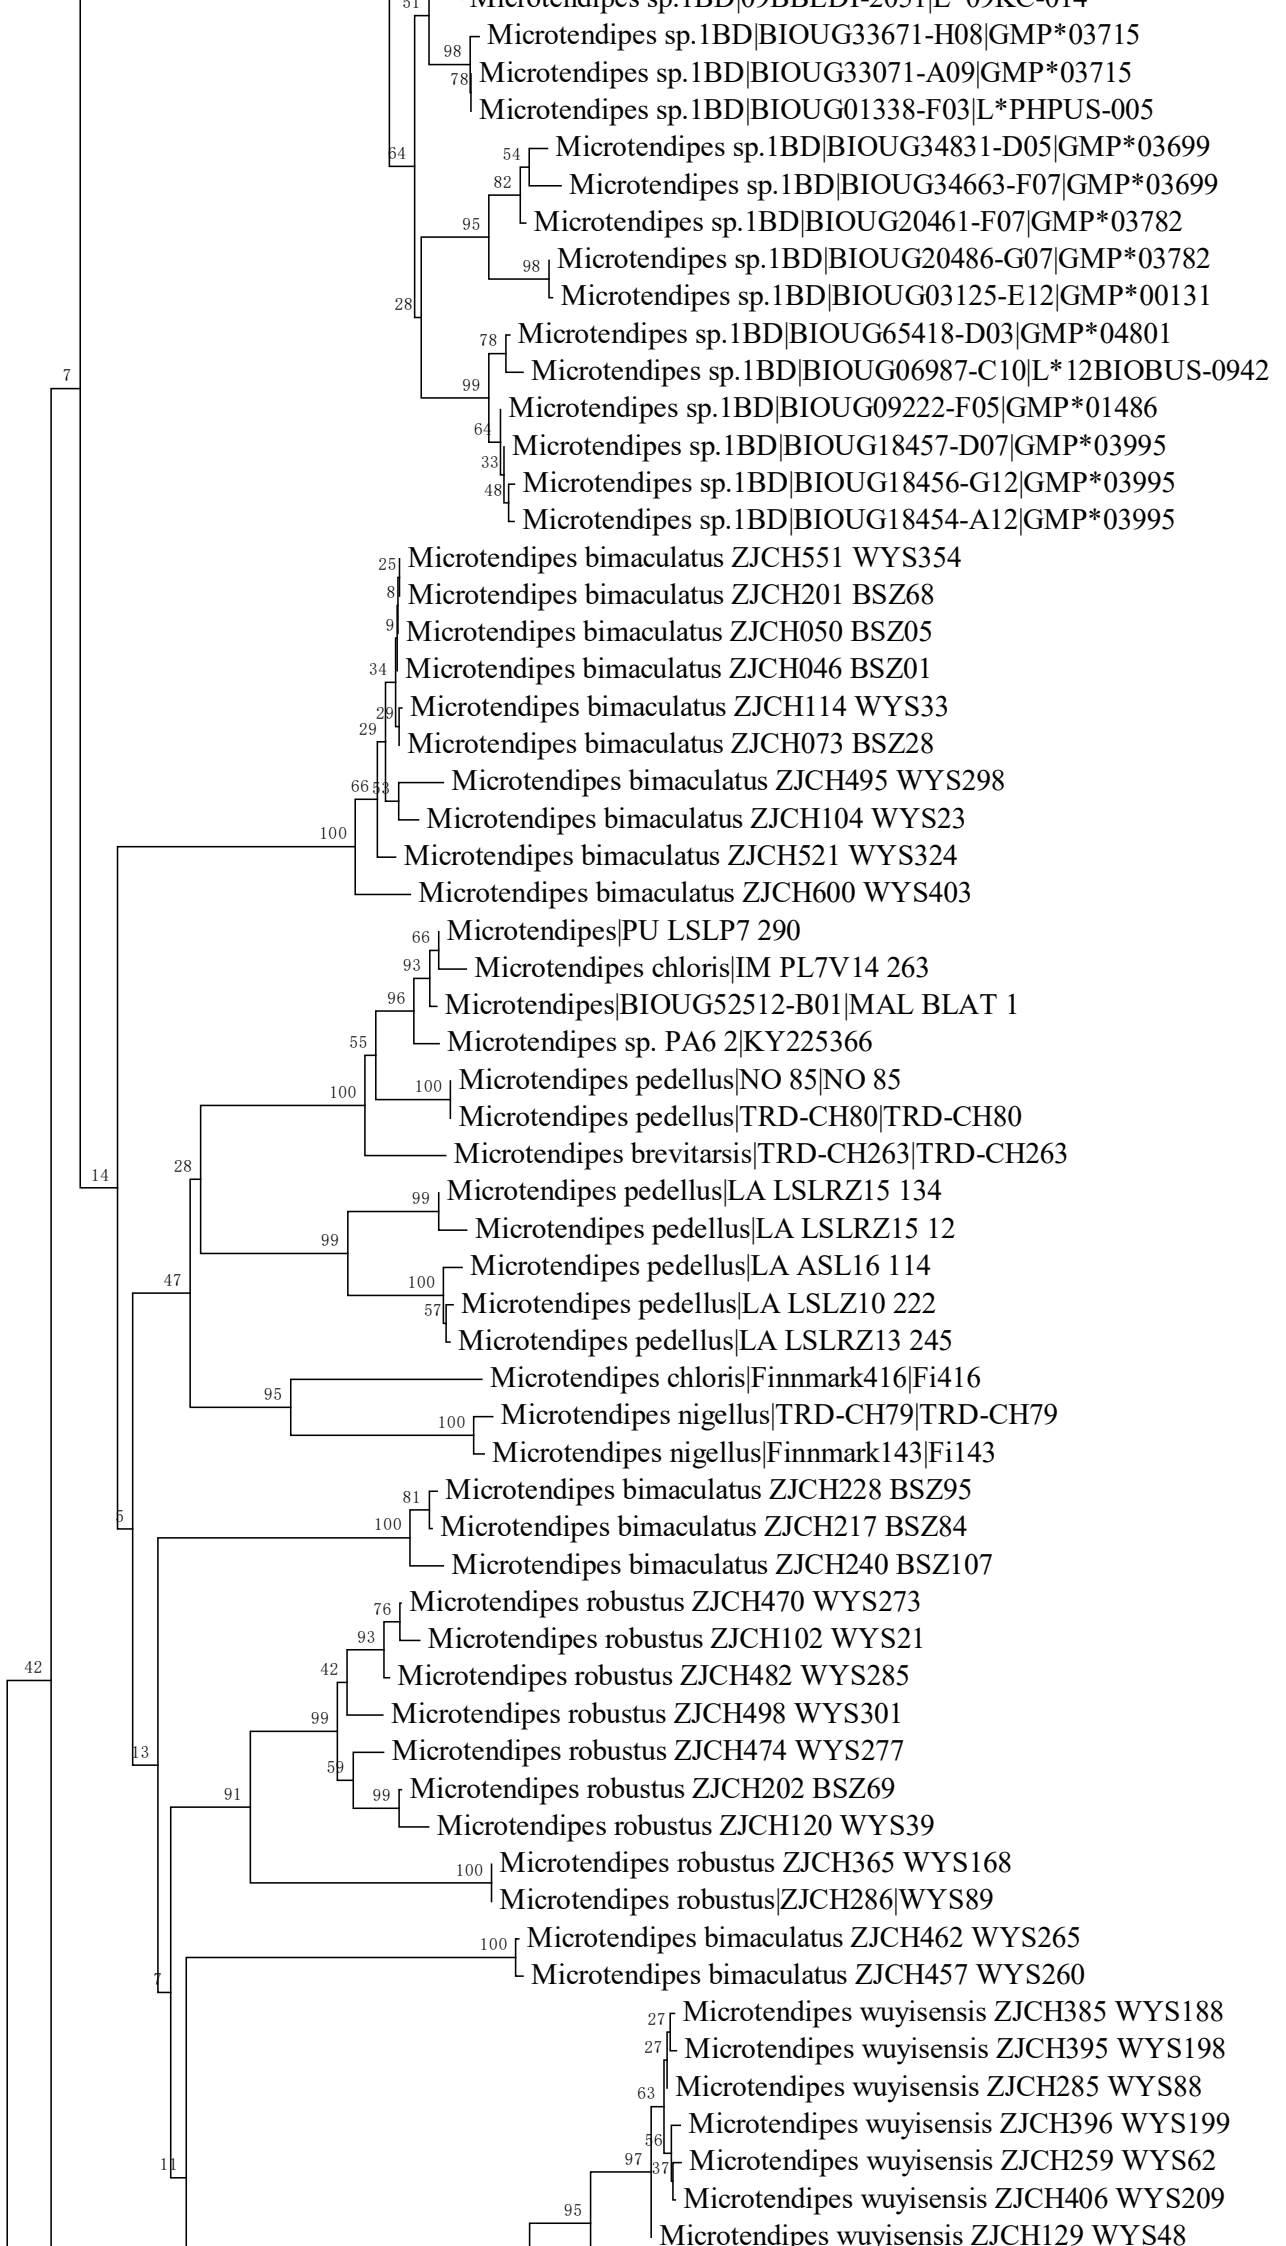

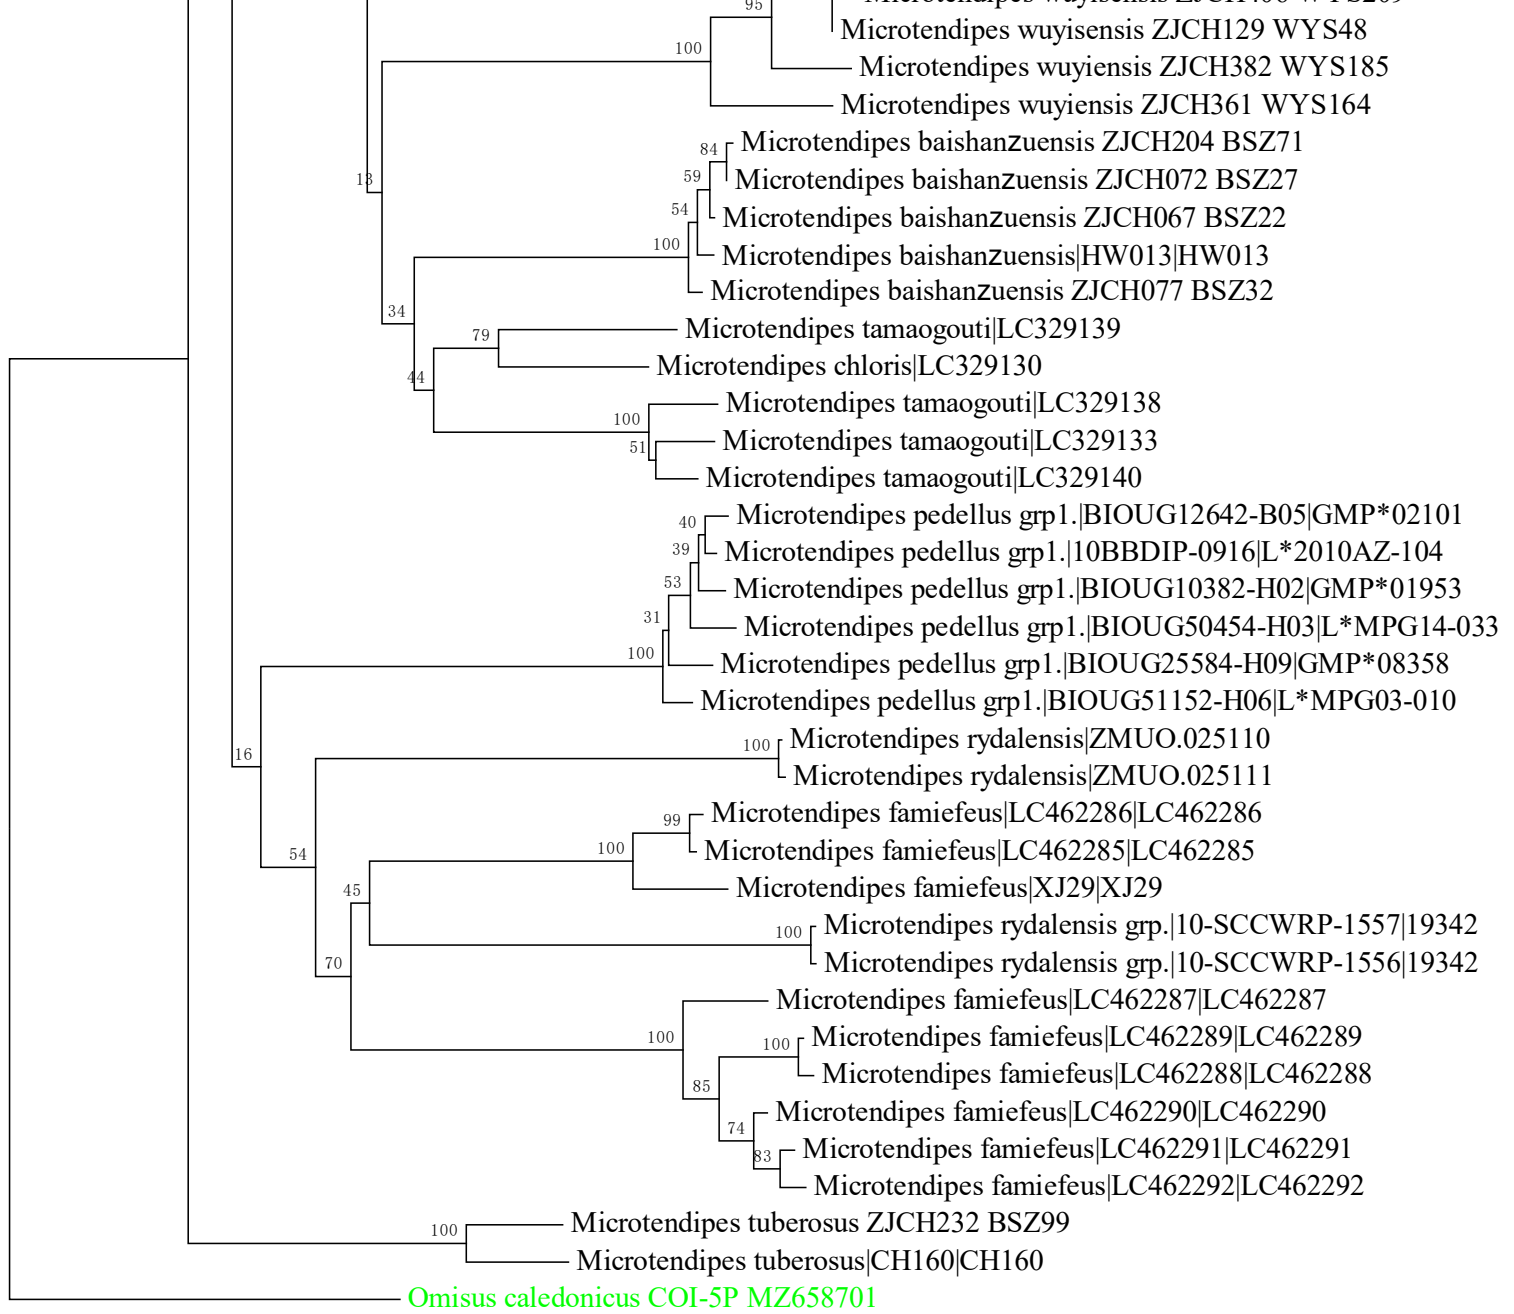

0.0100

Supplement: s1 [file s1]

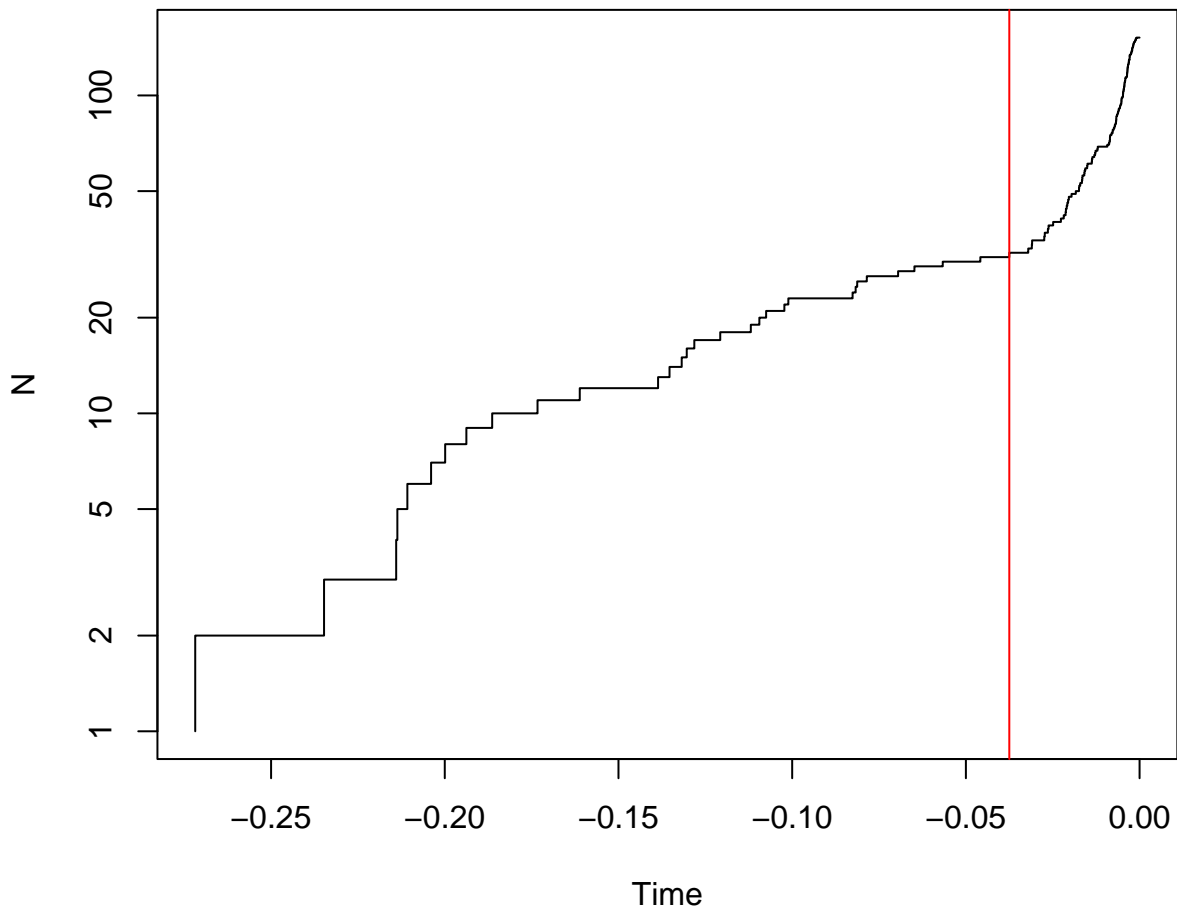

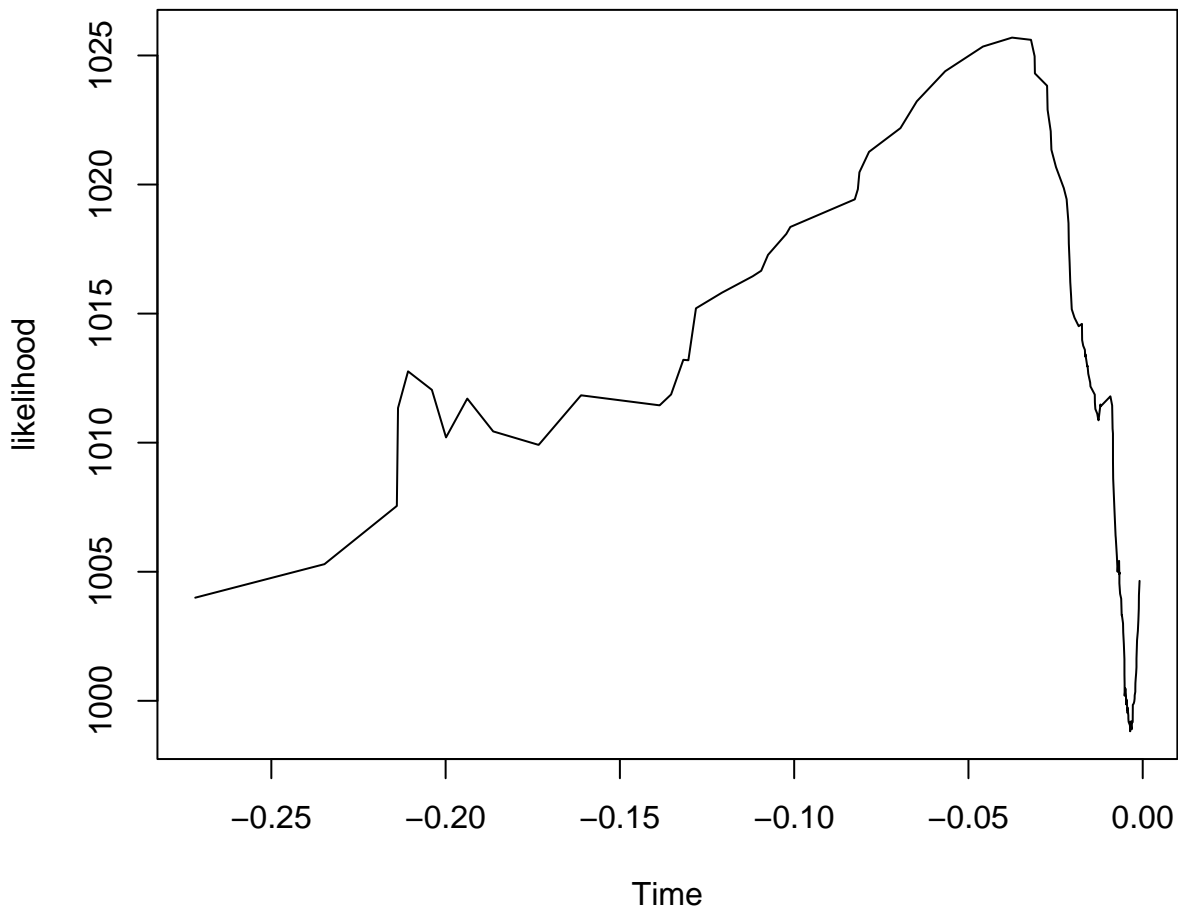

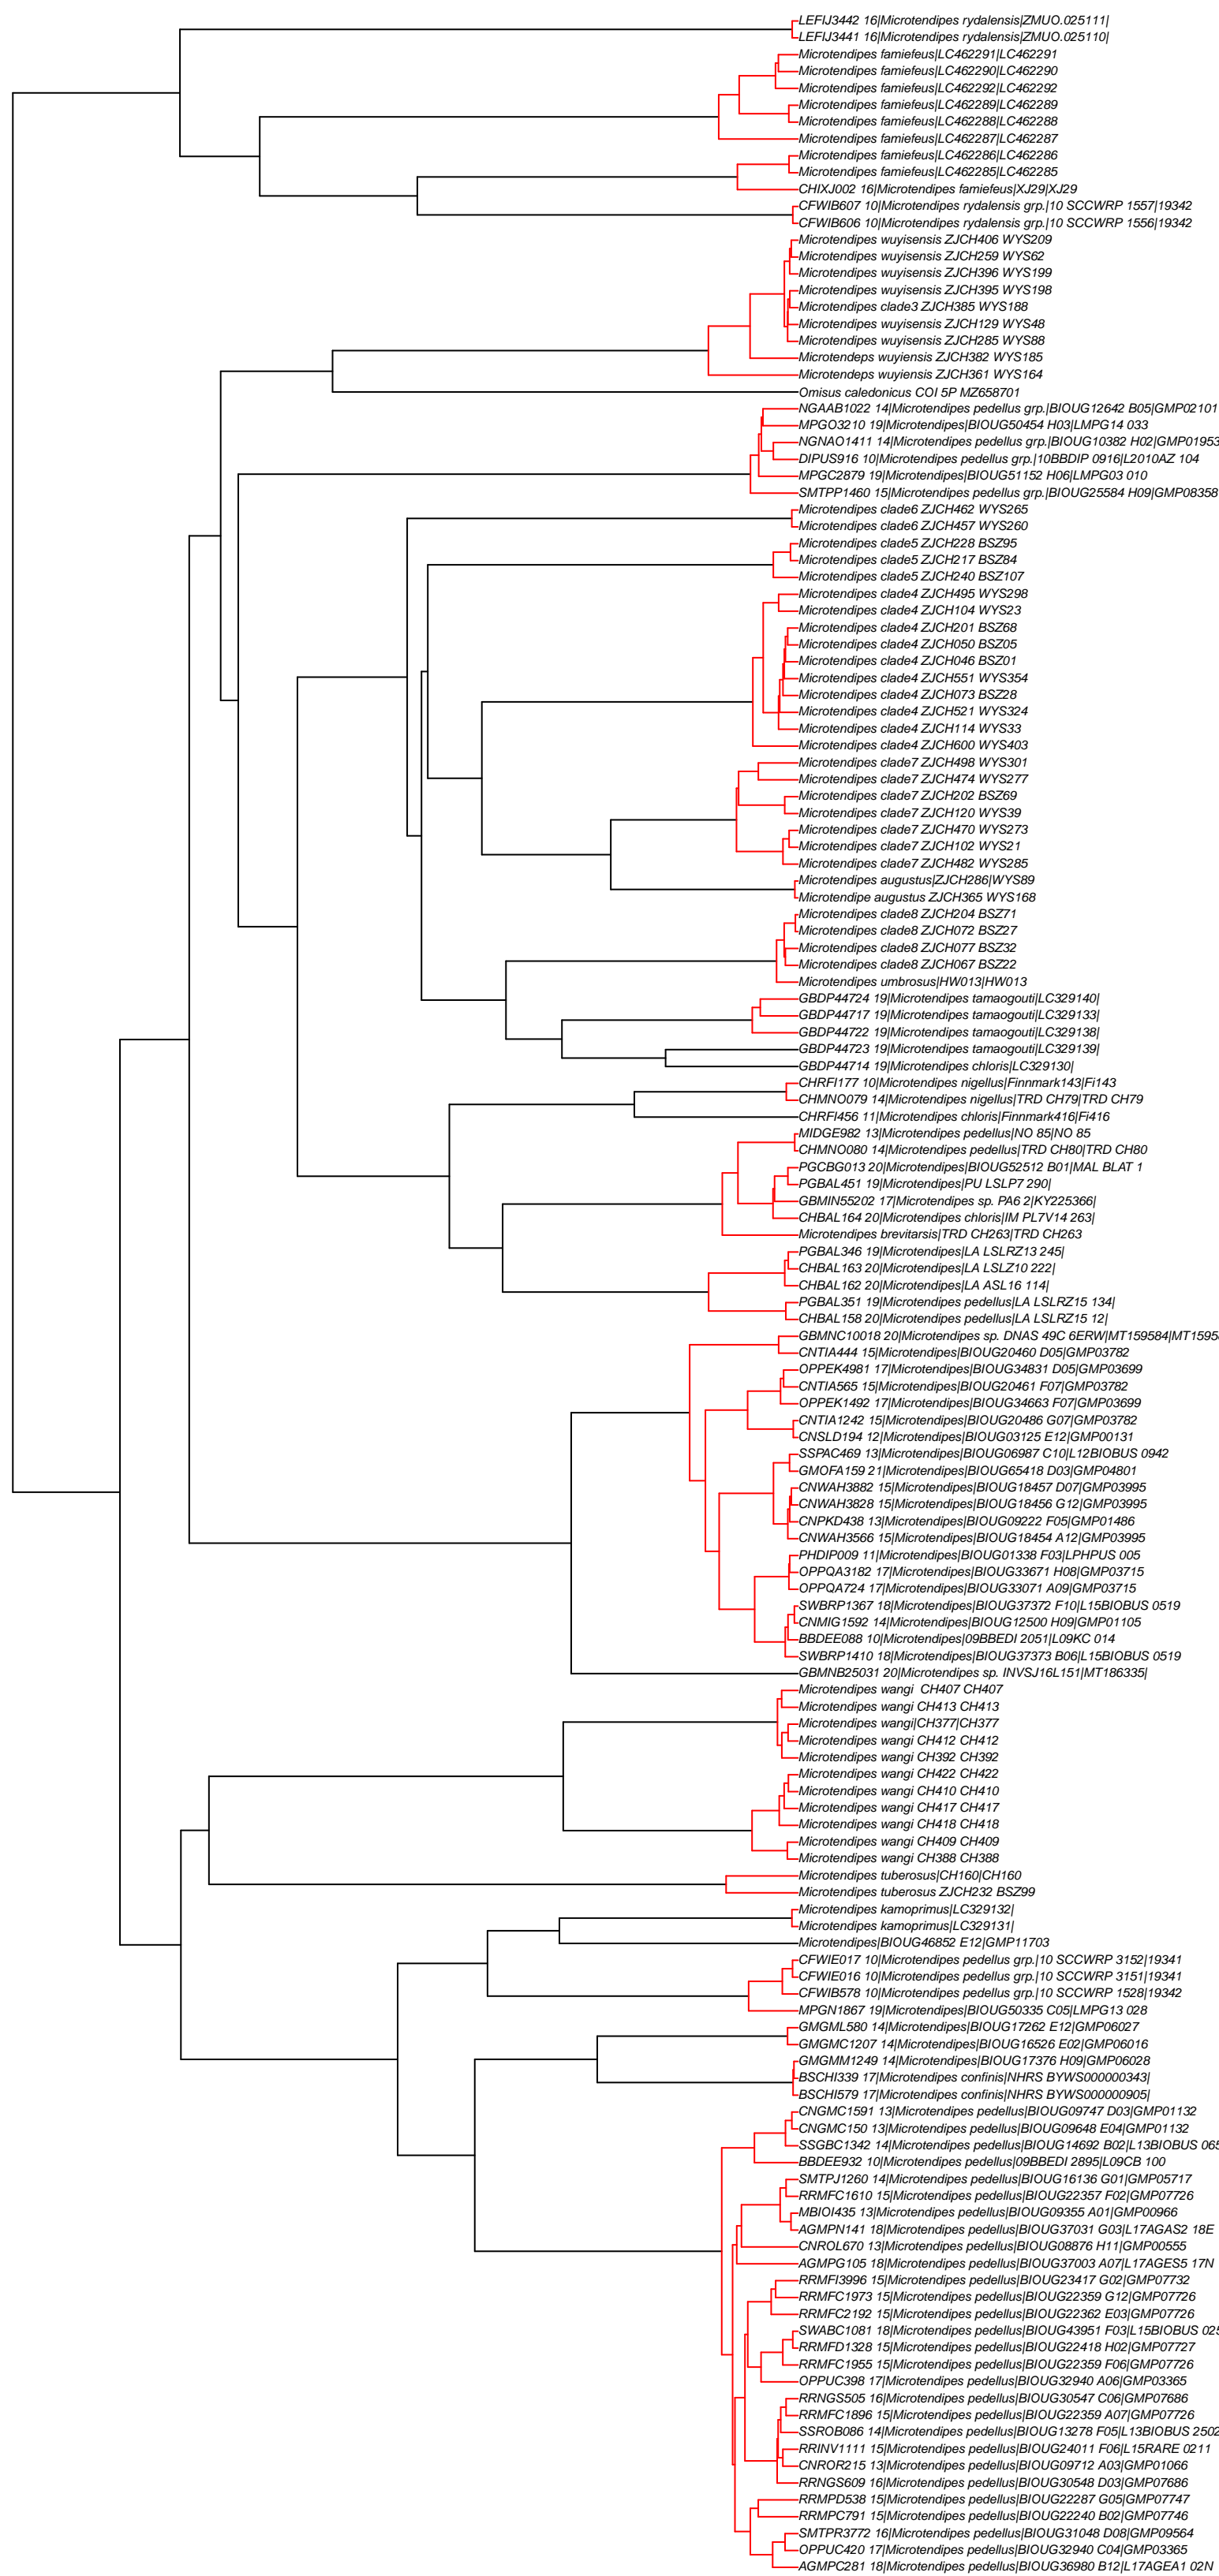

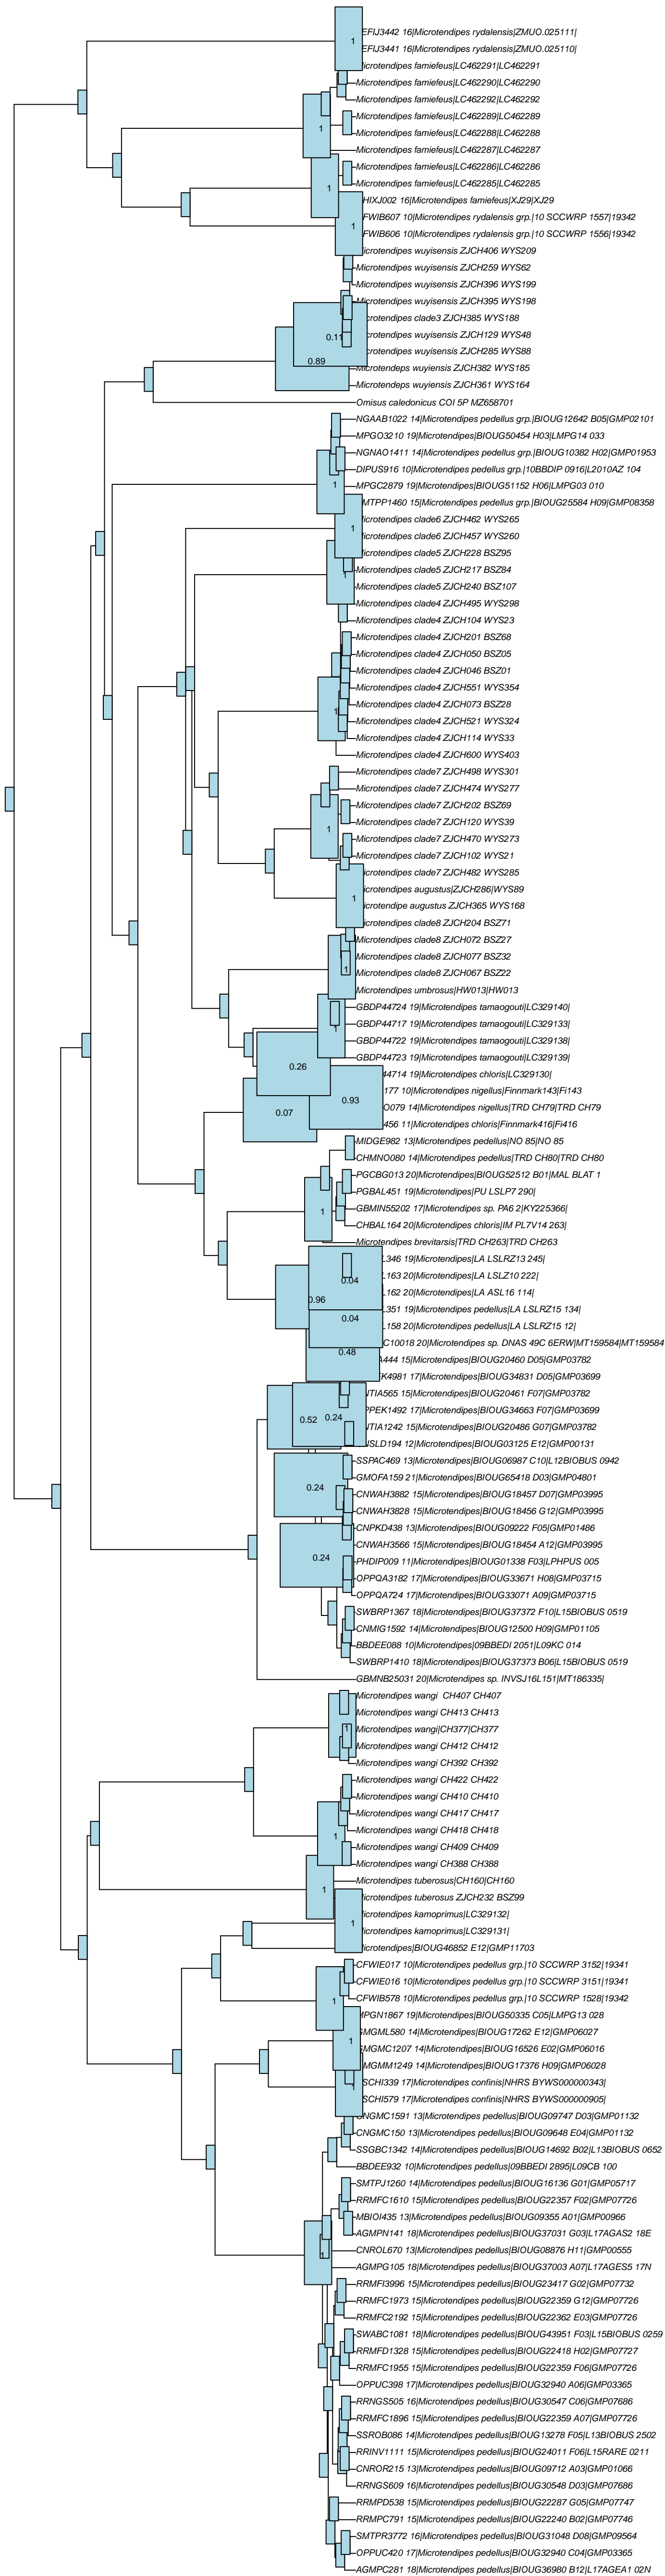

Supplement: s1 [file s1]
